# SUMOylation of ABCD3 restricts bile acid synthesis and regulates metabolic homeostasis.

Vanessa Goyon\*<sup>1</sup>, Aurèle Besse-Patin\*<sup>1</sup>, Rodolfo Zunino<sup>1</sup>, Mai Nguyen<sup>1</sup>, Étienne Coyaud<sup>3,4</sup>  
Jonathan M. Lee<sup>2</sup>, Bich N. Nguyen<sup>5,6</sup>, Brian Raught<sup>3,4</sup> and Heidi M. McBride<sup>1†</sup>

<sup>1</sup> Montreal Neurological Institute, McGill University 3801 University Ave., Montreal, QC, H3A 2B4 Canada

<sup>2</sup> Biochemistry, Microbiology & Immunology, 501 Smyth Rd, University of Ottawa, Ottawa, ON, K1H 8L6 Canada

<sup>3</sup> Princess Margaret Cancer Centre, University Health Network, 101 College St., Toronto, ON M5G 1L7 Canada

<sup>4</sup> Department of Medical Biophysics, University of Toronto

<sup>5</sup> Department of Pathology and Cell Biology, University of Montreal, Montreal, Québec, Canada

<sup>6</sup> University of Montreal Health Network, Montreal, Québec, Canada

\*authors contributed equally.

<sup>†</sup>to whom correspondence be addressed.

The authors have no conflict of interests to declare

Keywords: MUL1, peroxisome, SUMO, PMP70

Abstract word count: **202**

Word count: **11288** without references

Figures: 5

Supplementary figures: 5

Supplementary tables: 3

39 **Abstract**

40

41 **Mitochondrial anchored protein ligase (MAPL) has been shown to function as both a**  
42 **SUMO and ubiquitin ligase with multiple roles in mitochondrial quality control, cell death**  
43 **pathways and inflammation. To examine the global function of MAPL we generated a knock-**  
44 **out mouse model and sought functional insight through unbiased BioID, transcriptomics and**  
45 **metabolic analysis. MAPL KO mice are lean and highly insulin sensitive, ultimately developing**  
46 **fully penetrant, spontaneous hepatocellular carcinoma after 18 months. BioID revealed the**  
47 **peroxisomal bile acid transporter ABCD3 as a primary MAPL interacting partner, which we**  
48 **show is SUMOylated in a MAPL-dependent manner. MAPL KO animals showed increased bile**  
49 **acid secretion in vivo and in isolated primary hepatocytes, along with robust compensatory**  
50 **changes in the expression of enzymes synthesizing and detoxifying bile acid. In addition,**  
51 **MAPL KO livers showed signs of ER stress and secreted high levels of Fgf21, the starvation**  
52 **hormone known to drive the reduction of white fat stores and promote insulin sensitivity.**  
53 **Lastly, during aging all MAPL KO mice developed hepatocellular carcinomas. These data**  
54 **reveal a major function for MAPL in the regulation of bile acid synthesis leading to profound**  
55 **changes in whole body metabolism and the ultimate generation of liver cancer when MAPL is**  
56 **lost.**

57

58

## 59 Introduction

60 Mitochondria are an essential signaling platform that contributes to cell fate decisions,  
61 from cell cycle transitions to stem cell differentiation, T-cell activation, pathogen invasion,  
62 starvation and more (Nunnari and Suomalainen, 2012). An underlying reason for the integration  
63 of mitochondria within cellular signaling pathways is to signal the transcriptional and post-  
64 transcriptional changes required to alter fuel consumption and/or metabolite generation that  
65 drive cellular transitions. In this way signaling at mitochondria contributes to the global rewiring  
66 of cellular metabolism in response to a variety of extracellular stimuli and intracellular cues. It is  
67 becoming apparent that, akin to other signaling pathways, post-translational modifications  
68 including phosphorylation, ubiquitination and SUMOylation play a central role in the assembly  
69 and regulation of mitochondrial signaling complexes (Escobar-Henriques and Langer, 2014; He  
70 et al., 2020; Tait and Green, 2012; Tan and Finkel, 2020). The mechanistic details responsible  
71 for these modifications in mitochondrial signaling are however still largely unknown.

72 MAPL, a mitochondrial and peroxisomal anchored protein ligase (also called  
73 MUL1/GIDE/HADES/MULAN) (Jung et al., 2011; Li et al., 2015, 2008; Zhang et al., 2008) is a  
74 mitochondrial outer membrane protein carrying two transmembrane domains, a ~40kDa  
75 intermembrane space loop and C-terminal cytosolic RING finger with both SUMO and  
76 ubiquitination activities. It is also targeted to peroxisomes in mitochondrial vesicles and is part  
77 of the shared peroxisome/mitochondrial proteome. MAPL has been shown to modulate diverse  
78 cellular events including mitochondrial division, mitophagy, inflammation and cell death  
79 (Ambivero et al., 2014; Barry et al., 2018; Prudent et al., 2015; Rojansky et al., 2016; Yun et al.,  
80 2014). A common feature of MAPL induced SUMOylation of substrates is to stabilize complex  
81 formation or assembly, making it a prime candidate regulator of signaling platforms on  
82 mitochondria and peroxisomes (Prudent et al., 2015).

83 To better understand the primary function of MAPL we have explored the proximity  
84 interactors using unbiased BioID approaches (Roux, 2013; Roux et al., 2012). In addition to the  
85 core mitochondrial and peroxisomal fission machinery, the BioID identified peroxisomal ABCD3  
86 as an interacting partner and SUMOylation substrate of MAPL. ABCD3 was shown to transport  
87 the late stage precursors, the C27-bile acid intermediates 3 $\alpha$ ,7 $\alpha$ -dihydroxycholestanoic acid

88 (DHCA), 3 $\alpha$ ,7 $\alpha$ ,12 $\alpha$ -trihydroxycholestanic acid (THCA), and dicarboxylic fatty acids from cytosol  
89 into peroxisomes (Ferdinandusse et al., 2015; Ranea-Robles et al., 2021). With the generation  
90 of a MAPL knock-out mouse model, we uncovered a critical role for this SUMO E3 ligase in  
91 restricting the activity of ABCD3, highlighting new links to whole body metabolism. Further  
92 analysis of the MAPL deficient mice revealed increased hepatocyte proliferation, resistance to  
93 programmed cell death, and the development of hepatocellular carcinoma in aging mice. These  
94 data provide new insights into the post-translational regulation of bile acid metabolism within  
95 the liver, and the central role for peroxisomal SUMOylation in metabolic homeostasis.

## 96 **Results.**

### 97 **ABCD3/PMP70 is a MAPL substrate**

98 To identify MAPL interacting proteins we performed an unbiased proximity-dependent  
99 biotin identification (BioID) in HEK293 cells (Roux, 2013; Roux et al., 2012). As expected, BioID  
100 confirmed a robust interaction between MAPL and the fission GTPase DRP1 (**Fig 1A**) (Braschi et  
101 al., 2009; Neuspiel et al., 2008; Prudent et al., 2015). Indeed, essentially all of the mitochondrial  
102 fission machinery identified to date was identified in this analysis, including: the regulator of  
103 DRP1 recruitment AKAP1, the cAMP-dependent protein kinase type II-alpha regulatory subunit  
104 PRKAR2A, the DRP1 receptor MFF, the inverted formin INF2 (Kraus and Ryan, 2017), USP30, a  
105 regulator of mitophagy and pexophagy (Bingol et al., 2014; Marcassa et al., 2018), and others.  
106 Also present was the antiviral signaling protein MAVS, an interaction we and others have  
107 characterized previously (Doiron et al., 2017; Jenkins et al., 2013). Potential ubiquitin substrates  
108 of MAPL such as MFN1, MFN2, AKT, HIF1 $\alpha$ , or P53 were absent from the interactome at steady  
109 state.

110 Many ubiquitin E3 ligases target their substrates for 26S proteasome-mediated  
111 degradation, perhaps explaining the absence of any expected ubiquitin substrates of MAPL.  
112 Therefore, we repeated the BioID experiments in the presence of MG132 over 24 hours to  
113 stabilize and accumulate any potential ubiquitinated MAPL-FlagBirA\* substrates (Coyaud et al.,  
114 2015) (**Supplemental Table 1**). Notably, the number of peptides identified for the vast majority  
115 of MAPL interacting proteins remained unchanged in the presence of MG132, or were

116 decreased, suggesting that MAPL does not target its primary binding partners for proteasomal  
117 degradation. A few additional proteins were detected at very low levels after 24 hours of  
118 MG132 treatment, with peptide counts ranging from 7 to 24 (compared to 612 for AKAP1)  
119 including BAX, MIRO1, BNIP3 and MFN2.

120 Unexpectedly, the top ranked MAPL binding protein detected in this analysis was the  
121 peroxisomal bile acid transporter ABCD3/PMP70 (**Fig 1A**). We confirmed this result using  
122 western blot analysis of biotinylated ABCD3 captured on streptavidin beads after incubation of  
123 MAPL-BirA expressing cells with biotin (**Supplemental Fig 1A**). MAPL is delivered to  
124 peroxisomes through a vesicular transport pathway from mitochondria (Braschi et al., 2010;  
125 Neuspiel et al., 2008), where it plays a role in regulating peroxisomal fission (Mohanty et al.,  
126 2021). However, broader roles of MAPL in peroxisomes are unknown. Given that ABCD3 has a  
127 primary role in the generation of bile acids, we chose to validate the interaction and interrogate  
128 the potential functional consequences of their binding within the liver of our MAPL<sup>-/-</sup> mouse  
129 line (Doiron et al., 2017). Briefly, a parental C57Bl/6J strain carrying floxed alleles at exon2 was  
130 crossed with a *CMV-Cre* carrying strain to excise exon 2 in all cells, including the germline. After  
131 backcrossing out the *Cre* gene, the resultant strain was a germline knock out for MAPL (Doiron  
132 et al., 2017). We used these mice to test any interaction between native proteins by  
133 immunoprecipitating endogenous MAPL from liver of control or MAPL<sup>-/-</sup> mice. While the anti-  
134 MAPL antibodies did not efficiently precipitate endogenous MAPL, we still observed a MAPL-  
135 dependent interaction with ABCD3 from liver tissue (**Fig 1B**). We next monitored the  
136 SUMOylation of ABCD3 within the liver of MAPL<sup>-/-</sup> mice. For this we isolated cytosol (Cyt) and  
137 solubilized the heavy membrane (HM) fraction from MAPL<sup>f/f</sup> and MAPL<sup>-/-</sup> livers. These fractions  
138 were incubated with agarose beads conjugated to peptides encoding the consensus SUMO  
139 interacting motif (SIM) of the nuclear SUMO E3 ligases PIAS1-4 (Hecker et al., 2006). Indeed, we  
140 observed an ABCD3 immunoreactive band on the SIM beads of control livers, which was almost  
141 completely absent in livers from mice lacking MAPL (**Fig 1C, quantification Supplemental Fig**  
142 **1B**). The molecular weight of ABCD3 upon the SIM beads was slightly shifted, suggesting a  
143 mono-SUMOylation event. As a positive control MAPL was also required for the SUMOylation of  
144 DRP1 (**Fig 1C**) (Braschi et al., 2009; Prudent et al., 2015).

145 To further confirm whether MAPL was responsible for the SUMOylation of ABCD3 we  
146 generated adenovirus expressing MAPL-Flag, or a deletion construct lacking the C-terminal  
147 RING finger required for SUMO conjugation or ubiquitination (MAPL- $\Delta$ RING-FLAG). The viruses  
148 (including an empty virus [rtTA] as negative control) were injected into the tail vein to target  
149 the expression of MAPL specifically within the liver. ABCD3 SUMOylation was restored upon  
150 expression of full length MAPL, but not in MAPL- $\Delta$ RING-FLAG (**Fig 1D**). Given the interaction  
151 between MAPL and ABCD3 observed within the BioID and IP experiments, coupled with the  
152 functional rescue of ABCD3 SUMOylation upon re-expression of MAPL, these data establish  
153 MAPL as an essential regulator of ABCD3 SUMOylation.

154 We next examined the consequences of the loss of MAPL on the biochemical properties  
155 of ABCD3 in liver. Consistent with our evidence that MAPL does not generally regulate protein  
156 turnover, the total mRNA and protein levels of ABCD3 were unchanged in total liver extracts as  
157 were Drp1 and Mfn2 protein levels (**Supplemental Fig 1C, D**). We also considered that  
158 peroxisomal function, biogenesis or turnover may have been globally altered in MAPL<sup>-/-</sup> liver,  
159 but observed no change in the expression levels of the peroxisomal proteins PEX14, ACOX1 and  
160 SCP2 (**Supplemental Fig 1E**).

161 As a half transporter, ABCD3 assembles into both homo- and heterodimers (Guimarães  
162 et al., 2004). To examine potential changes in the oligomeric assemblies of ABCD3 in the  
163 absence of MAPL, we performed sucrose gradients from solubilized mouse liver extracts. As  
164 previously described (van Roermund et al., 2014), the 70 kDa ABCD3 protein migrated at a  
165 higher molecular weight, consistent with a higher order oligomeric structure (**Fig 1E**).  
166 Consistent with the abundance of ABCD3 in the MAPL BioID, MAPL co-migrates with ABCD3 in  
167 fractions 5, 6 and 7 on the sucrose gradient. Notably, extracts isolated from MAPL<sup>-/-</sup> mice  
168 revealed a change in the migration pattern of ABCD3, with ABCD3 spreading throughout the  
169 higher molecular weight fractions, indicating that MAPL SUMOylation activity is required to  
170 maintain a stable oligomeric assembly of the ABCD3 transporter.

171 In sum, the data demonstrate that ABCD3 is SUMOylated by MAPL in liver tissue, a  
172 process required to regulate a peroxisomal ABCD3 complex. This provides the first evidence of a  
173 post-translational modification in the regulation of ABCD3 assembly.

174

175

176 **MAPL is required to gate the synthesis of bile acids in liver.**

177 To determine whether the loss of ABCD3 SUMOylation may alter circulating bile acid  
178 levels, we quantified total bile acids in plasma, and observed a 3-5-fold increase in the levels  
179 within MAPL<sup>-/-</sup> mice (**Fig 2A**). Tail-vein injection of adenovirus expressing MAPL rescued the  
180 elevation in circulating bile acids in a RING-dependent manner, demonstrating the requirement  
181 for MAPL in repressing bile acid metabolism. (**Fig 2B**). We then employed quantitative mass  
182 spectrometry using standards for over 40 selected bile acid conjugate species within circulation  
183 and in liver (see **Supplemental Fig 2A** for schematic of bile acids) (Han et al., 2015). These data  
184 revealed a significant decrease in the precursors DHCA and THCA within liver, with a  
185 concomitant increase in mature bile acid species in both plasma and liver. This indicated that  
186 the activity of bile acid synthesis was increased in these livers, leading to, for example beta-  
187 muricholic (b-MCA) acid increasing from ~10000 to 30000 fmol/g of liver tissue, and in plasma  
188 from 600 nM to 3500 nM in the MAPL<sup>-/-</sup> serum (**Fig 2C, Supplemental Fig 2B, Supplemental**  
189 **Table 2**).

190 We then performed a transcriptome analysis of liver from 8 mice of each genotype aged  
191 5 months, revealing highly significant changes, most notably in the bile acid and steroid  
192 hormone synthesis pathways of the liver (**Fig 2D, E, Supplemental Table 3**). Bile acid synthesis  
193 in the liver occurs through 2 distinct pathways, the liver specific classical pathway requiring the  
194 ER localized cholesterol 7-alpha-hydroxylase, CYP7A1 (black arrows, **Fig 2F**), and the alternative  
195 or acidic pathway initiated in the mitochondria by sterol 27-hydroxylase CYP27A1 (red arrows,  
196 **Fig 2F**) that oxidizes cholesterol to 27-hydroxycholesterol (Wang et al., 2021). The 27-  
197 hydroxycholesterol derived in the mitochondria is then shuttled back to the ER where it is acted  
198 upon by 25-hydroxycholesterol 7-alpha-hydroxylase, CYP7B1 to generate 5-cholesten-3 $\beta$ ,7 $\alpha$ ,27  
199 triol, which is converted to the late stage C27 precursors DHCA and THCA for transport into the  
200 peroxisome. Therefore, for complete synthesis of primary bile acids, the metabolites must flux  
201 between the ER, mitochondria, peroxisomes and cytosol (**Fig 2F**). The transcriptome identified  
202 *Cyp7B1* as a major downregulated mRNA in MAPL<sup>-/-</sup> liver (**Fig 2E**), however there were no

203 available antibodies to confirm this reduction at the protein level. Therefore, we examined the  
204 protein levels of CYP27A1 and CYP7A1, representing each arm of the bile acid synthesis  
205 pathway. The data showed that the initial enzyme CYP27A1 in the alternative (or acidic) bile  
206 synthesis pathway was downregulated to 66% of control mice, consistent with a compensatory  
207 adaptation to lower total bile acid synthesis. Although liver and serum bile acids were increased  
208 significantly, the initiating enzyme of the classical pathway, CYP7A1 was unchanged (**Fig 2G,**  
209 **quantification Supplemental Fig 2C**). We confirmed the transcriptome data further using qRT-  
210 PCR from liver mRNA, showing a near loss of *Hsd3b5* and *Cyp7B1* mRNA, as well as a significant,  
211 25% reduction in *Cyp27A1* mRNA (**Supplemental Fig 2D**). *Cyp7A1* and *Cyp8B1* were unchanged.  
212 In contrast, there was an upregulation of proteins involved in detoxifying bile acid  
213 intermediates and lipid soluble xenotoxins, including CYP3A11 and CYP4A14 (**Fig 2D, E, G,**  
214 **Supplemental Fig 2C, D**) (Wagner et al., 2005), and UDP-glucuronidation transferase 1A12  
215 (UGT1A12, also called 1A9, **Fig 2E**), which converts lipid soluble sterols, hormones or bilirubin to  
216 water soluble, excretable metabolites (Bosma et al., 1994), all consistent with compensation to  
217 limit toxicity from elevated bile acids, and reduce synthesis. We further confirmed that MAPL  
218 depletion in liver was responsible for the near loss of *Hsd3b5* and the upregulation of *Cyp4A14*,  
219 as tail-vein injection of adenovirus expressing MAPL rescued the normal expression of these  
220 proteins in a RING-dependent manner (**Supplemental Fig 2E, F**).

221 We examined the established components of the regulatory feedback loop that controls  
222 *Cyp7A1* expression and found that circulating FGF15 levels were unchanged (**Supplemental Fig**  
223 **2G**) (Chiang, 2009). FGF15 is secreted from the ileum in response to the bile acids that recycle  
224 across the ileum. In addition, the liver expression of the bile acid responsive Farnesoid Receptor  
225 transcription factor FXR, (gene name *Nr1h4*) was also unchanged (**Supplemental Fig 2H**)  
226 (Matsubara et al., 2013). Therefore, while we observe significant increases in bile acids in liver  
227 and plasma, the sensing system for feedback regulation of the classical pathway remained  
228 curiously unaltered.

229

230 **Increased bile acid synthesis parallels increased FGF21 secretion; that can be uncoupled from**  
231 **ER stress.**



232           Almost 90% of the cholesterol within the mouse liver is used to make bile, making this  
233 one of the most dominant biochemical cascades in liver (Wanders, 2013). An accumulation of  
234 intracellular bile acids have been shown to result in ER stress, leading to a transcriptional  
235 response increasing expression of the detoxifying enzymes *Cyp3A11* and *Cyp4A14* (Bochkis et  
236 al., 2008), as we observed in *MAPL<sup>-/-</sup>* liver. An examination of ER stress markers revealed a  
237 robust increase in the phosphorylation of PERK, and CHOP expression in livers of *MAPL<sup>-/-</sup>*  
238 animals (**Fig 3A, quantification Supplemental Fig 3A**). Consistent with PERK activation, we  
239 observed the phosphorylation of a primary substrate, the translation initiation factor 2 $\alpha$ , EIF2 $\alpha$   
240 (**Fig 3B, quantification Supplemental Fig 3A**) (Hetz, 2012). This reduces the translation of most  
241 mRNAs, allowing selective translation of the transcription factor ATF4. The upregulation of an  
242 ATF4 target gene (Salminen et al., 2017), *Fgf21* mRNA was observed in the transcriptome  
243 analysis (**Supplemental Table 3**), and by qRT-PCR we observe a robust ~30 fold increase (**Fig**  
244 **3C**), and a corresponding increase at the protein level in *MAPL<sup>-/-</sup>* liver (**Fig 3D, quantification**  
245 **Supplemental Fig 3B**). *Fgf21* mRNA was increased in other tissues 2-6-fold (**Fig 3C**). Importantly,  
246 circulating levels of FGF21, quantified by ELISA showed a 12-fold increase in *MAPL<sup>-/-</sup>* mice (**Fig**  
247 **3E**). Circulating FGF21 binds to heterotrimeric surface receptors comprised of FGFR1c, FGFR2c  
248 or FGFR3c, in complex with the  $\beta$ -Klotho receptors (Itoh, 2014; Owen et al., 2014). Initially  
249 thought to act primarily to signal the “browning” of white adipocytes, FGF21 binds receptors  
250 within the suprachiasmatic nucleus (SCN) of the hypothalamus and the dorsal vagal complex of  
251 the hindbrain (Bookout et al., 2013; Owen et al., 2014; Patel et al., 2015). Indeed the lean  
252 phenotype resulting from FGF21 expression was shown to be independent of the uncoupler  
253 UCP1 that is central to the browning of white adipocytes (Veniant et al., 2015). FGF21 binding  
254 within the suprachiasmatic nucleus leads to dramatic alterations in circulating glucocorticoids,  
255 altering circadian rhythm, thirst, blood pressure, and whole body metabolism (BonDurant and  
256 Potthoff, 2018; Bookout et al., 2013; Pan et al., 2018; Song et al., 2018). Consistent with these  
257 findings, we also observe a ~4-fold increase in circulating corticosterone levels, and 10-fold  
258 increase in liver of *MAPL<sup>-/-</sup>* mice (**Supplemental Fig 3C**). In addition, evidence in rodents has  
259 shown FGF21 as a negative regulator of bile acid synthesis (Chen et al., 2018), again consistent

260 with FGF21 upregulation within MAPL<sup>-/-</sup> mice playing a potentially compensatory role to reduce  
261 bile acid synthesis.

262 While there was chronic activation of ER stress within the MAPL<sup>-/-</sup> liver, the circulating  
263 levels of liver damage markers ALT and AST were only mildly increased. Therefore, ER stress did  
264 not appear pathological, and we observed no evidence of gross liver damage, steatosis or fatty  
265 liver upon histological examination (**Fig 3F, Supplemental Fig 3D, E**). As described above, any  
266 liver damage resulting from ER stress may have been ameliorated through the compensatory  
267 upregulation of detoxifying enzymes like CYP4A14 and CYP3A11 (**Fig 2G**). If the ER stress is  
268 related to increased bile acid synthesis, it should be liver specific. To test this, we examined the  
269 activation of CHOP and PERK in other tissues (**Fig 3G**). In addition to liver, we observed an  
270 increase in the phosphorylation of PERK in the stomach, but this was not accompanied by an  
271 increase in CHOP. However, there was no sign of ER stress in muscle, brain, spleen or  
272 embryonic fibroblasts, consistent with a liver specific role of MAPL in the regulation of bile acids  
273 and generation of ER stress.

274 As *Fgf21* is a transcriptional target of ATF4, which is selectively translated during ER (or  
275 mitochondrial) stress, it would follow that FGF21 expression should be dependent upon ER  
276 stress. However, while tail vein rescue of MAPL expression showed a complete RING-dependent  
277 restoration of circulating and liver *Fgf21* mRNA and its protein levels, the ER stress remained  
278 (**Fig 3H,I,J, Supplemental Fig 3F**). The tail-vein injection of empty adenovirus (rtTA) induced ER  
279 stress in liver, potentially masking any rescue that may have resulted from MAPL expression  
280 (**Supplemental Fig 3G**). Nevertheless, the experiment reveals an ER stress-independent  
281 regulation of FGF21 expression that instead appears to directly parallel the levels of circulating  
282 bile acids.

283

284

### 285 **MAPL<sup>-/-</sup> mice are lean**

286 A primary phenotype resulting from elevated levels of circulating FGF21 is a lean phenotype  
287 involving both autocrine and paracrine signaling pathways between the liver, brain and  
288 adipocytes (Flippo and Potthoff, 2021; Zhang et al., 2012). Consistent with these studies, mice

289 lacking MAPL are of equal weight upon weaning, but rapidly reveal a lean phenotype, with an  
290 inability to gain weight on a high fat diet (**males in FIG 4A, B, females in Supplemental Fig 4A,**  
291 **B**). Examining tissues revealed a loss in white adipocyte mass due to decreased lipid content as  
292 the primary cause of leanness, where body length and other tissue mass were unaltered (**Fig**  
293 **4C, D, E, Supplemental Fig 4C, D**). We observed browning of white fat in ~30% of mice, when  
294 examining the expression of UCP1 in white fat by both qRT-PCR and western blot analysis (**Fig**  
295 **4F, Supplemental Fig 4E**), however this did not correlate with the 100% of mice that were lean,  
296 consistent with primary targets of FGF21 in the brain. Given their metabolic phenotype, we  
297 performed insulin and glucose tolerance tests to monitor glucose handling and biogenesis.  
298 Injection of insulin led to an equivalent reduction in glycemia, however, MAPL<sup>-/-</sup> mice were  
299 unable to restore their glucose levels over the 120-minute time course (males in **Fig 4G,**  
300 **females in Supplemental Fig 4F**). Glucose tolerance tests revealed a more rapid glucose  
301 clearance in MAPL<sup>-/-</sup> vs. control mice, suggesting increased insulin sensitivity in MAPL-deficient  
302 animals (**males in Fig 4H, females in Supplemental Fig 4G**). Indeed, an analysis of circulating  
303 insulin revealed a ~3-fold reduction in insulinemia in MAPL<sup>-/-</sup> compared to control mice (**Fig 4I**).  
304 In addition, glycogen storage in MAPL-deficient livers was also reduced by ~50% as compared to  
305 control livers in *ad libidum* fed animals (**Supplemental Fig 4H**). Importantly, reconstitution of  
306 MAPL expression in liver via tail vein injection increased insulinemia, thereby suggesting that  
307 the changes in insulin levels stem from the liver rather than effects in muscle, pancreas, or the  
308 periphery (**Fig 4J**). Overall, these data show that MAPL<sup>-/-</sup> mice are profoundly insulin sensitive.  
309

### 310 **MAPL<sup>-/-</sup> mice develop spontaneous hepatocellular carcinoma**

311 The loss of MAPL led to the chronic elevation of bile acids and FGF21. High levels of bile  
312 acids have been shown to promote cell proliferation and stem cell activation through TGR5  
313 receptor binding in multiple organs (Sorrentino et al., 2020) while elevated FGF21 levels extend  
314 lifespan and improves metabolic health (Flippo and Potthoff, 2021; Zhang et al., 2012).  
315 Histology revealed atypia in the livers of MAPL<sup>-/-</sup> animals, as early as 2 months, which increased  
316 in severity with age, from scattered changes to pseudo-inclusions, dysplasia, and aberrant  
317 mitotic events. (**Supplemental 5A**). This was accompanied by a ~5 and ~ 15-fold increase in

318 hepatocyte proliferation in 2- and 7-month-old MAPL<sup>-/-</sup> relative to control mice, respectively as  
319 evidenced by the Ki67 staining (**Fig 5A**). There was no obvious sign of steatosis or inflammation  
320 within MAPL<sup>-/-</sup> livers, commonly linked to liver dysfunction.

321 Then, we aged these animals to determine the longer-term effects of these alterations.  
322 While survival was only slightly reduced in aged MAPL<sup>-/-</sup> mice relative to wild-type littermates  
323 (**males shown Fig 5B, females in Supplemental Fig 5B**), 87% and 89% (n=8 and 9) of the MAPL<sup>-/-</sup>  
324 males and females, respectively, presented with liver cancer between 14-28 months (**Fig 5C,**  
325 **supplemental Fig 5C**). Histological analysis from 17 tumours in different mice (both males and  
326 females) stained with H&E and reticulin confirmed all had hepatocellular carcinoma, however  
327 some of the tumours had mixed pathology (**Fig 5D**). In contrast, no littermate controls within  
328 this cohort developed any malignancies.

329 These findings implicate MAPL within a pathway where it exerts a tumor suppressive  
330 role in the liver. Tumor suppressors are also defined by their ability to drive or promote cell  
331 death upon overexpression. Indeed we previously described critical roles for MAPL and the  
332 SUMOylation of DRP1 in the process of apoptosis (Prudent et al., 2015), hinting that some of  
333 the cancer phenotype may arise due to an inhibition in cell death. To test whether ectopic  
334 expression of MAPL may promote cell death directly we infected a human liver cell line Huh7  
335 with adenovirus expressing MAPL-Flag, MAPL-ΔRING-Flag SUMOylation-deficient mutant or the  
336 empty vector (Ad-rtTA). Expression of wild-type but not SUMOylation-deficient mutant MAPL  
337 led to cell death showing ~ 4% of cells remaining after 24 hours (**Fig 5E**). This was accompanied  
338 by the cleavage of caspases 3 and 7, thus indicating that forced expression of MAPL induced cell  
339 death (**Fig 5F**). Moreover, expression of SUMO competent MAPL in Rat2 fibroblasts stably  
340 expressing oncogenic H-Ras<sup>V12</sup> also led to an arrest in anchorage-independent cell growth and  
341 cell death initiation, as seen with PARP cleavage (**Fig 5G**). Therefore, ectopic expression of  
342 MAPL promotes cell death and reduces neoplastic growth *in vitro*. Lastly, we examined the  
343 capacity of MAPL<sup>-/-</sup> primary hepatocytes to resist cell death induced in two distinct ways.  
344 Infection of primary hepatocytes with truncated Bid (tBID) revealed that cells lacking MAPL  
345 were more sensitive to this direct induction of death. However, induction of DNA damage upon  
346 incubation with the DNA intercalating agent camptothecin showed complete resistance to cell

347 death compared to littermate floxed hepatocytes. Therefore, while MAPL is not essential for  
348 the steps driving apoptosis downstream of activated BAX, loss of MAPL is highly protective  
349 against genotoxic stress. These data show that expression of MAPL is a driver of cell death, and  
350 loss of MAPL offers significant resistant to cell death, consistent with its liver tumor suppressor  
351 activity *in vivo*.

352

## 353 Discussion.

354 MAPL was first identified as a RING-finger containing ligase transported to peroxisomes  
355 from mitochondria in vesicular carriers, but its primary role there has been unclear. Here we  
356 present an unbiased interactome that identified previously described targets of MAPL,  
357 including Drp1 and MAVS (Braschi et al., 2009; Doiron et al., 2017; Prudent et al., 2015), which  
358 extends the list of new potential targets. This included nearly all of the machinery that  
359 regulates mitochondrial division, the ubiquitin protease USP30, and others. Previously  
360 described ubiquitin targets of MAPL were not identified in this interactome, and experiments  
361 performed in the presence of the proteasome inhibitor MG132 did not support a primary role  
362 for MAPL in the regulation of protein turnover. However, the identification of USP30 as a  
363 potential target hints that MAPL may modify USP30 directly, a deubiquitinase shown to target  
364 Parkin substrates, reversing mitophagy and Parkin-mediated protein turnover (Bingol et al.,  
365 2014; Marcassa et al., 2018). In this way, reported effects of MAPL on protein turnover and  
366 mitophagy may reflect indirect mechanisms.

367 While the BioID identifies multiple potential targets for MAPL, the top hit was the  
368 peroxisomal bile acid transporter, ABCD3. Our analysis of this interaction demonstrated that  
369 ABCD3 is SUMOylated in a MAPL-dependent manner *in vivo*, a modification seen to regulate the  
370 assembly into a higher molecular weight complex. This is the first documentation of  
371 SUMOylation as a regulatory post-translational modification of the bile acid transport  
372 machinery. Functionally, the loss of MAPL led to an increased production of bile acids from  
373 liver, suggesting that the SUMO conjugated form of ABCD3 may act as a gate to inhibit  
374 transport of the C27 precursors. This would be consistent with evidence for SUMO conjugation  
375 acting as a gating mechanism of potassium transporters at the plasma membrane, among

376 others. Future work is necessary to better define how SUMOylation of ABCD3 acts to stabilize  
377 the oligomeric form and gate the channel.

378 The transcriptome analysis from liver also revealed a significant upregulation of *Fgf21*  
379 mRNA, which was confirmed with qRT-PCR and at the protein level in liver and plasma.

380 Consistent with the elevation of circulating FGF21, MAPL<sup>-/-</sup> mice are lean and resistant to weight  
381 gain on a high fat diet. FGF21 expression has been tightly linked to starvation and ER stress  
382 (BonDurant and Potthoff, 2018), and ER stress was observed in MAPL<sup>-/-</sup> liver. However, while  
383 tail vein rescue of MAPL expression in liver demonstrated that FGF21 expression was not linked  
384 to ER stress in this system. Compensatory induction of hepatic FGF21 lead to insulin sensitivity,  
385 leanness and diet-induced obesity resistance. Finally, our data do not yet distinguish whether  
386 FGF21 expression resulted directly from the increase in bile acids through FXR (Cyphert et al.,  
387 2012) or TGR5 (Donepudi et al., 2017) signaling, or whether it may relate to an unknown  
388 functional target of MAPL in liver.

389 An interesting aspect of this study is that loss of MAPL led to an alteration in the  
390 “alternative” pathway of bile acid synthesis without any change in the canonical, classical  
391 pathway. Although the transcriptional regulation of the classical enzyme CYP7A1 is very well  
392 studied (Chiang, 2009), the regulation of the more broadly expressed CYP27A1 and CYP7B1 is  
393 less clear (Stiles et al., 2009). The latter enzymes are expressed in multiple tissues, playing roles  
394 in sterol conversion and cholesterol homeostasis in different cell types. The regulation of  
395 CYP27A1 expression is tissue specific and broad, with links to bile acid feedback, PPAR agonists,  
396 insulin signaling, growth hormones and glucocorticoids (Lorbek et al., 2012). A recent study  
397 showed a specific upregulation of CYP7B1 during cold exposure, leading to increased bile acid  
398 secretion, altered microbiome and heat production (Worthmann et al., 2017). The mechanisms  
399 regulating CYP7B1 expression in that study was not elucidated and we now reveal a role for  
400 MAPL in modulating this specific arm of bile acid metabolism. In the case of MAPL<sup>-/-</sup> mice, the  
401 reduction in CYP7B1 and CYP27A1 appear to be compensatory, accompanying increases in  
402 sterol clearance and detoxification pathways, likely minimizing liver damage. Circulating bile  
403 acids have been shown to bind to the G-coupled protein receptor TGR5 within multiple organs  
404 including adipocytes, brain, and gut (de Boer et al., 2018) . Therefore, the global phenotype of

405 MAPL deficient mice will almost certainly be impacted by the elevated circulating bile in  
406 multiple ways, along with potential cell autonomous functions of MAPL in different tissues. Our  
407 study has focused first on the primary phenotype in liver where our study identified a critical  
408 function for MAPL in bile acid metabolism.

409         Ultimately, mice lacking MAPL also showed increased hepatocyte proliferation and later  
410 development of hepatocellular carcinoma. While this is consistent with emerging roles for bile  
411 acids driving hepatocyte proliferation (Anakk et al., 2013), the circuitry of these events will also  
412 be a focus of our future work.

413         MAPL/MUL1 has been previously linked to numerous cellular processes including  
414 mitophagy (Ambivero et al., 2014; Li et al., 2015; Rojansky et al., 2016; Yun et al., 2014),  
415 inflammation (Barry et al., 2018; Ni et al., 2017), antiviral (Doiron et al., 2017; Jenkins et al.,  
416 2013), apoptosis (Prudent et al., 2015) and proliferation (Jung et al., 2011; Zhang et al., 2008),  
417 where its activity allows the dynamic and rapid regulation of diverse signals. Our previous  
418 studies demonstrated DRP1 as another substrate of MAPL, playing a key role in stabilizing the  
419 oligomeric DRP1 during cell death. The fission machinery was identified within the BiO1D here as  
420 well and we demonstrate that ectopic expression of MAPL activated cell death pathways. Our  
421 data also reveal that loss of MAPL restrict cell death pathways induced by genotoxic stress, that  
422 may further contribute to tumor formation. Our future work will continue to investigate how  
423 the tumor suppressive activity of MAPL functions in the regulation of global metabolism in liver,  
424 and the potential relevance of MAPL function within human cancers. The *MUL1* gene lies on  
425 chromosome 1p36, which is a very commonly deleted region in human cancer. While there are  
426 many genes within this region of the chromosomes, the NCI cancer genome atlas reports the  
427 most common cancer with loss of *MUL1* is cholangiocarcinoma. For now, the MAPL<sup>-/-</sup> mice  
428 provide a new model to better understand the complex signaling pathways within in different  
429 tissues, and under a variety of stimuli.

430

431

432

## 433 **Methods**

### 434 **Ethics Approval:**

435 Animal experimentation was conducted in accordance with the guidelines of the Canadian  
436 Council for Animal Care, with protocols approved by the Animal Care Committees of the  
437 University of Ottawa and of McGill University.

438

### 439 **Generation of floxed MAPL KO mice:**

440 The targeting vector and the *MAPL*<sup>WT/flox</sup> mice were generated by Ozgene (Australia). The  
441 construct contained two loxP sequences inserted in intron 1 and intron 2 of the *MAPL* gene,  
442 and two frt sites flanking the neomycin resistance selection cassette. The construct was  
443 electroporated into C57BL/6 ES cell line, Bruce4 (Köntgen et al., 1993). Homologous  
444 recombinant ES cell clones were identified by Southern hybridization and injected into BALB/cJ  
445 blastocysts. Male chimeric mice were obtained and crossed to C57BL/6J females to establish  
446 heterozygous germline offspring on pure C57BL/6 background. To remove the Neo-cassette  
447 (neo), the *MAPL*<sup>WT/flox</sup> mice were bred with homozygous FlpE-“deletor” C57BL/6 mice (Ozgene).  
448 To generate *MAPL*<sup>-/-</sup> mice, *MAPL*<sup>ff</sup> mice were first bred with *CMV-Cre* carrying out mice (The  
449 Jackson Laboratory). The resulting *MAPL*<sup>+/-:Cre</sup> were then bred with *MAPL*<sup>ff</sup> animals. One quarter  
450 of the offspring were *MAPL*<sup>ff/-</sup>. These heterozygous mice, devoid of the *CMV-Cre* gene, were  
451 used as breeders: their offsprings were composed of 25% *MAPL*<sup>-/-</sup> animals, 25% of *MAPL*<sup>ff/ff</sup>  
452 animals used as littermate wild type controls and 50% of *MAPL*<sup>ff/-</sup> animals used as littermate  
453 heterozygous controls.

454 Genotyping was performed by PCR of tail DNA (extracted using the DNA Blood & Tissue kit,  
455 QIAGEN, according to the manufacturer's instruction) using two different primer pairs (Primer1:  
456 Fwd :5'-GGGAAGTGTGTCCTTATG Rev: 5'-AATCCCAAGTCCACAGTGC and Primer2: Fwd: 5'-  
457 CCTCAGAGTTCATTTATCC Rev: 5'-CCAACACCATCAAAGGC).

458



459 Mice were fed *ad libitum* either normal chow or a high fat diet (60% fat, 20% proteins, 20%  
460 carbohydrate, Research Diets, for 10 weeks, starting at 12 weeks old). The food intake and body  
461 weight of each mouse were recorded weekly.

#### 462 **Metabolic tests**

463 Glucose tolerance tests (GTT) were performed after an overnight (16h fast). Blood glucose and  
464 plasma insulin levels were measured after intra-peritoneal injection of glucose (2 g/kg of body  
465 weight). Insulin tolerance tests (ITT) were performed after intra-peritoneal injection of human  
466 insulin (0.5 U/kg) in 2-h-fasted mice.

#### 467 **Primary hepatocytes isolation, culture and glucose production**

468 Primary hepatocytes were isolated from 12- to 16-week-old mice by 2-step liberase perfusion  
469 (Liberase TL; MilliporeSigma #05401020001) and 50% Percoll gradient purification  
470 (MilliporeSigma #P1644). Cells were plated on collagen coated plates and cultured in  
471 Dulbecco's modified Eagle's medium supplemented with 0.2% bovine serum albumin (fatty acid  
472 free; Fisher Scientific), 25 mM glucose, 2 mM sodium pyruvate, 0.1mM dexamethasone, 1%  
473 penicillin/streptomycin, and 1 nM insulin for up to 48 hours. To measure glucose production,  
474 primary hepatocytes were switched to basic medium (DMEM with 0.2% BSA and 1 mM  
475 glutamine, with no glucose, red phenol or sodium pyruvate) for 2 h to induce glycogenolysis  
476 and deplete glycogen. Basic media containing 2 mM lactate, 1 mM pyruvate, 1 mM glycerol  
477 with or without 10 nM glucagon (to promote gluconeogenesis) was exchanged and harvested  
478 every hour for 3 h. Glucose released was measured by enzymatic reaction (Hexokinase assay  
479 #GAHK20 MilliporeSigma) and normalized to protein content per well.

480

#### 481 **Adenovirus tail vein injection:**

482  $2 \times 10^9$  PFU/mouse (MAPL-Flag) or  $0.67 \times 10^9$  PFU/mouse (MAPL- $\Delta$ RING-Flag and rtTA) of  
483 adenoviruses were injected through the tail vein in a 100  $\mu$ l final volume of sterile saline  
484 solution to 2-3 month old animals. At day 7 post injection, mice were starved overnight and fed  
485 back for 3 hours (from 8 to 11AM). Blood was then collected by cardiac puncture and livers  
486 were collected for further investigations.

487 **Electrophoresis and immunoblot analysis:**

488 Tissues were homogenized in ice-cold lysis buffer (40 mM NaCl, 2 mM EDTA, 1 mM  
489 orthovanadate, 50 mM NaF, 10 mM pyrophosphate, 10 mM glycerolphosphate, 20 mM NEM,  
490 1% Triton X-100, 50 mM Hepes, pH 7.4) supplemented with Complete protease inhibitor  
491 cocktail (Roche Molecular Biochemicals) in a borosilicate glass Dounce tissue grinder with tight  
492 pestle. After 20 min at 4°C, homogenates were centrifuges at 20,000 g for 20 min at 4°C, and  
493 the supernatants were collected. Protein extracts (20 µg) were separated on a Tris-Glycine 4-  
494 20% gradient precast polyacrylamide gel (Invitrogen), and transferred to 0.22 µm pore  
495 nitrocellulose membrane (Bio-Rad). Bands were visualized with Western-Lightning PLUS-ECL  
496 (Perkin-Elmer) with an INTAS ChemoCam (INTAS Science Imaging GmbH) and quantified with  
497 ImageJ software

498

499 MAPL was detected by rabbit polyclonal antibodies (HPA017681, 1:1,000, Sigma), PERK by  
500 rabbit polyclonal antibodies (100-401-962, 1:1,000, Rockland antibodies & assays), phospho-  
501 PERK by rabbit monoclonal antibodies (3179, 1:1,000, Cell Signaling), eIF2α by mouse  
502 monoclonal antibodies (2103, 1:500, Cell Signaling), phospho-eIF2α by rabbit polyclonal  
503 antibodies (SAB4504388, 1:500, Sigma), Fgf21 by goat polyclonal antibodies (AF3057, 1:500,  
504 R&D systems), CHOP by rabbit polyclonal antibodies (5554, 1:500, Cell Signaling), BiP by rabbit  
505 polyclonal antibodies (ADI-SPA-826-D, 1:1000, Enzo), CYP3A11 by rabbit polyclonal antibodies  
506 (13384, 1:500, Cell Signaling), CYP4A14 by goat polyclonal antibodies (sc-46087, 1:500, Santa  
507 Cruz), CYP7A1 by rabbit polyclonal antibodies (ab65596, 1:500, Abcam), CYP27A1 by rabbit  
508 polyclonal antibodies (NBP2-16061, 1:500, Novus Biologicals), SUMO1 by mouse monoclonal  
509 antibodies (332400, 1:1000, Invitrogen), Hsp60 by mouse monoclonal antibodies (sc-136291,  
510 1:1000, Santa Cruz), Hsp70 by rabbit polyclonal antibodies (ab137680, 1:1000, Abcam), ABCD3  
511 by mouse monoclonal antibodies (sab4200181, 1:1000, Sigma), DRP1 by mouse monoclonal  
512 antibodies (611113, 1:1000, BD Transduction Labs), Mfn2 by rabbit polyclonal antibodies  
513 (M6319, 1:1000, Sigma), UCP1 by a polyclonal antibody (U6382, 1:500, Sigma), ACOX1 by a  
514 polyclonal antibody (10957-1-AP, 1:1000, Proteintech), SCP2 by a polyclonal antibody (14377-1-  
515 AP, 1:1000, Proteintech), PEX14 by a polyclonal antibody (ABC142, 1:1000, Millipore), vinculin

516 by a monoclonal antibody (V4505, 1:1000, Sigma),  $\beta$ -actin by rabbit polyclonal antibodies  
517 (SAB4502543, 1:1,000, Sigma) and  $\beta$ -actin by mouse monoclonal antibodies (A2228, 1:1,000,  
518 Sigma).

519

#### 520 **Cellular fractionation:**

521 Liver was collected into ice-cold PBS and rinsed free of blood. It was minced into small pieces  
522 and homogenized using a Dounce homogenizer (3-4 times, 1,600 rpm) into IB isolation buffer  
523 (mannitol 200 mM, sucrose 68 mM, Hepes 20 mM pH 7.4, KCl 80 mM, EGTA 0.5 mM,  
524 Mg(Acetate)<sub>2</sub> 2 mM, 2-chloroacetamide 20 mM and protease inhibitors 1X). Homogenate was  
525 centrifuged at 800g for 10 min to separate nuclear pellet from post-nuclear supernatant. The  
526 nuclear pellet was resuspended into 2 ml of IB buffer and centrifuged once again at 800 g for 10  
527 min. Pellet was resuspended into 200  $\mu$ l IB and kept as nuclear fraction. The post nuclear  
528 supernatant was centrifuged at 1,000 g for 10 min. The supernatant was kept and centrifuged  
529 at 10,000 g for 20 min to separate mitochondrial heavy membrane pellet and post-  
530 mitochondrial supernatant. Mitochondrial pellet was washed in 1 ml IB and centrifuged at  
531 10,000 g for 10 min. The final mitochondrial pellet was resuspended into 50  $\mu$ l IB and kept as  
532 mitochondrial fraction. The post-mitochondrial supernatant was centrifuged at 200,000 g in  
533 TLA-110 rotor (Beckman-Coulter) for 40 min. Supernatant was kept as cytosolic fraction.

534

#### 535 **Immunoprecipitation:**

536 For the MAPL immunoprecipitation, livers from 4 month old males were washed in ice-cold PBS  
537 and homogenized in 5ml of lysis buffer (50 mM Tris, 150 mM NaCl, 0.5 mM EDTA, 2 mM MgCl<sub>2</sub>,  
538 1% triton X-100, 20 mM NEM, pH 7.5) supplemented with Complete protease inhibitor cocktail  
539 (Roche Molecular Biochemicals) in a borosilicate glass Dounce tissue grinder with tight pestle.  
540 After 20 min at 4°C rocking, homogenates were centrifuged at 20,000 g for 20 min at 4°C and  
541 supernatants were collected. 1mg of proteins (diluted at 2 mg/ml in lysis buffer) was pre-  
542 cleared overnight at 4°C, rocking with 100  $\mu$ l of Dynabeads protein A beads (Life Technologies).  
543 100  $\mu$ l of Dynabeads protein A beads (resuspended in 200  $\mu$ l of 0.1 M NaP, 0.08% Tween 20)  
544 per condition were incubated overnight with 5  $\mu$ g of antibodies. The next day, antibodies were

545 covalently bound to the beads using DMP crosslinker (Pierce) 20 mM, for 30 min at RT, rocking  
546 in the dark) and crosslink reaction was stopped by 50 mM Tris pH 7.5 for 15 min at RT, rocking.  
547 Beads were washed 2 times with 100  $\mu$ l of 0.1 M glycine pH 2.5. Precleared homogenates (1:20  
548 was saved as starting material, SM) were applied on the antibodies-bound beads overnight at  
549 4°C, rocking. The next day, homogenates were removed from the beads and beads were  
550 washed 2 times with lysis buffer, 2 times with high salt buffer (50 mM Tris, 450 mM NaCl, 0.5  
551 mM EDTA, 2 mM MgCl<sub>2</sub>, 0.05% triton X-100, 20 mM NEM, pH 7.5) and 2 times with low salt  
552 buffer (50 mM Tris, 150 mM NaCl, 0.5 mM EDTA, 2 mM MgCl<sub>2</sub>, 0.05% triton X-100, 20 mM  
553 NEM, pH 7.5). Proteins were eluted with 50  $\mu$ l of 0.1 M glycine, pH 2.5, 0.5% Triton X-100 (2  
554 times). 20  $\mu$ l of Tris 1 M pH 7.5 were added to the elution.

555

#### 556 **SIM-beads extracts from livers:**

557 Mouse livers were washed in ice-cold PBS and resuspended in cell fractionation buffer. Cells  
558 were then broken with a cell cracker (EMBL-Heidelberg) using ball size 8.002. The samples were  
559 centrifuged at 800 g at 4°C for 10 min. Supernatants were re-cleared at 800 g for 5 min at 4°C.  
560 Post-nuclear supernatants were then centrifuged at 9,000 g for 20 min at 4°C, in order to pellet  
561 heavy membrane fraction (supernatant is the cytosolic fraction). The pellets were washed and  
562 re-centrifuged for a further 10 min at 9,000 g. To heavy membrane and cytosolic fractions,  
563 Triton X-100 was added up to 1% concentration, followed by incubation for 20 min at 4°C,  
564 rocking. The fraction lysates were then centrifuged for 45 min at 200,000 g at 4°C. Supernatants  
565 were then collected and protein concentration determined (80  $\mu$ g total lysate fraction of each  
566 type were separated to run in gel as starting material). Then 40  $\mu$ l of SIM beads (AM-200,  
567 Boston Biochemicals) were added to each type of total lysate fractions (containing 0.5-1 mg of  
568 proteins) and incubated for at least 1.5 hours at 4°C, rocking, followed by centrifugation at  
569 14,000 g for 2 min at 4°C. Beads were then washed 5 times with cell fractionation buffer  
570 containing 1% Triton X-100. After the last wash was discarded, 1X Laemmli sample buffer was  
571 added to the solid beads and run in acrylamide gel, together with the starting material.

572

#### 573 **BirA and Flag-MAPL-BirA stable cells**

574 HEK293T-REX cells stably expressing either BirA or Flag-MAPL-BirA were maintained in DMEM  
575 (Wisent) containing 10 % FBS (Wisent), 2 mM L-glutamine, non-essential amino acids and 1 mM  
576 sodium pyruvate (Life Technologies). The expression of BirA and Flag-MAPL BirA was induced  
577 with 1 ug/ml tetracycline (Sigma) for 24 hours in culture at 37°C, accompanied by 50 µM biotin  
578 (Sigma) final concentration. After the incubation, the cells on plates were washed 3 times in  
579 PBS, then they were scrapped on ice and lysed for 20 min in buffer: 10 mM Hepes pH 7.4, 200  
580 mM NaCl, 0.5 mM EDTA, 2 mM MgCl<sub>2</sub>, 1 % Triton-X100. Lysates were centrifuged (20,000 g at  
581 4°C for 15 min), normalized for protein concentration and incubated with streptavidin-agarose  
582 beads (Life Technologies) for 1.5 hour rocking at 4°C. Beads were centrifuged, washed 3 times  
583 with lysis buffer, mixed with 1 X Laemmli buffer, and loaded onto a gel, along with starting  
584 material. Then electrophoresis was performed, and proteins were transferred to nitrocellulose  
585 membranes. Expression of Flag-BirA-MAPL, as well other candidate proteins for interacting with  
586 MAPL, was determined by western blot with a series of antibodies.

587

588

#### 589 **Sucrose gradient:**

590 Livers from 2-month-old males were washed in ice-cold PBS and homogenized in 3 ml of  
591 homogenization buffer (50 mM Tris, 150 mM NaCl, 0.5 mM EDTA, 2 mM MgCl<sub>2</sub>, 20 mM NEM)  
592 supplemented with Complete protease inhibitor cocktail (Roche Molecular Biochemicals). A  
593 fraction of the homogenates was sonicated in order to quantify protein content. Homogenates  
594 were diluted in homogenization buffer to 4.7 mg/ml. 500 µl of homogenate at 4.7 mg/ml were  
595 added to 500 µl of homogenization buffer containing 1% DDM. After 20 min at 4°C rocking,  
596 homogenates were centrifuged 20 min at 4°C at 14,000 rpm. Supernatants were collected, and  
597 protein content determined. 250 µg of proteins were loaded on the top of the 10-50% sucrose  
598 linear gradient (1800 µl, 200 µl of each) and centrifuged for 4 hours at 4°C, at 180,000 g. 12  
599 fractions were collected and 75µ l of the different fractions were loaded on a 10% acrylamide  
600 gel.

601

#### 602 **Blood analysis:**

603 Each tube was added with 250  $\mu$ L acetonitrile and the samples were homogenized again,  
604 followed by centrifugation at 15000 rpm and 10C for 5 min. 200  $\mu$ L of the supernatants were  
605 mixed with 50  $\mu$ L of the same IS solution, followed by PD-SPE using the same procedure as done  
606 for mouse serum. The residues were reconstituted in 200  $\mu$ L of 50% methanol.

607 20  $\mu$ L of each of the above samples was injected onto a 15-cm long C18 UPLC column for  
608 quantitation of bile acids by UPLC-(-)ESI/MRM/MS with negative-ion mode detection and with  
609 water-acetonitrile-formic acid as the mobile phase for binary gradient elution, using the same  
610 method as described in the publication. UPLC-MRM/MS runs were performed on a Dionex  
611 Ultimate 3000 UPLC system coupled to a 4000 QTRAP triple-quad mass spectrometer.

612 Concentrations of the detected bile acids were calculated with internal standard calibration  
613 from calibration curves prepared for individual compounds. For concentration calculation, the  
614 14 D-labeled bile acids were used as IS for their corresponding non-D-labeled forms. For the bile  
615 acids, THCA and DHCA, for which there were no D-labeled analogues as IS, chenodeoxycholic-  
616 D4 acid was used as the common IS for quantitation of the unconjugated bile acids, THCA and  
617 DHCA; tauro-CDCA-D4 was used as the common IS for quantitation of the taurine-conjugated  
618 species; glyco-deoxycholic-D4 acid was used as the common IS for quantitation of the glycine-  
619 conjugated species.

620 Concentrations of the following bile acids were also estimated in this analysis: glyco- $\omega$ -MCA,  
621 glyco- $\alpha$ -MCA, glyco- $\beta$ -MCA, glyco- $\lambda$ -MCA (also as glyco- $\gamma$ -MCA or glycohyocholic acid) or glyco-  
622 allocholic acid. Since there were no standard substances for these compounds, their  
623 concentrations were calculated from the calibration curve of glycocholic acid.

624 Another 20  $\mu$ L of each of the same samples was injected again onto the same C18 UPLC column  
625 for UPLC-MRM/MS quantitation of corticosterone, but with positive-ion (+) mode detection.

626

## 627 **Illumina**

628 Total RNAs from the liver of 3 mice from each strain (5 months old) were isolated using the  
629 TRIzol kit, following manufacturers protocols (Invitrogen), as described bellow. RNAs were  
630 quantified using a NanoDrop Spectrophotometer ND-1000 (NanoDrop Technologies, Inc.) and

631 its integrity was assessed using a 2100 Bioanalyzer (Agilent Technologies). Double stranded  
632 cDNA was synthesized from 250ng of total RNA, and *in vitro* transcription was performed to  
633 produce biotin-labeled cRNA using Illumina® TotalPrep RNA Amplification Kit, according to  
634 manufacturer's instructions (Life Technologies). The labeled cRNA was then normalized at  
635 1500ng and hybridized on Mouse WG-6, v.2 according to Illumina's Whole-Genome Gene  
636 Expression Direct Hybridization Assay Guide. The BeadChips were incubated in an Illumina  
637 Hybridization oven at 58°C for 14 to 20 hours at a rocking speed of 5. Beadchips were washed  
638 also according to Illumina's Whole-Genome Gene Expression Direct Hybridization Assay Guide  
639 and scanned on an Illumina iScan Reader. RNA from each mouse was sequenced in triplicate.  
640 Results were analyzed using the FlexArray software (provided by Genome Quebec). Volcano  
641 plot was calculated using a 2 fold increase and decrease lower limit, with p values lower or  
642 equal to 0.05.

643

#### 644 **BioID**

645 BioID (Roux et al., 2012) was carried out essentially as described previously (Comartin et al.,  
646 2013). In brief, the full-length human MAPL (BC014010) coding sequence was amplified by PCR  
647 and cloned into a pcDNA5 FRT/TO BirA\*FLAG expression vector (MAPL-Ascl\_Fwd:  
648 tataGGCGCGCCaATGGAGAGCGGAGGGCGGCCCTCG; MAPL-NotI\_Rev:  
649 ttaaGCGGCCGCGCTGTTGTACAGGGGTATCACCCG). Using the Flp-In system (Invitrogen), 293T-  
650 REx Flp-In cells stably expressing MAPL-BirA\*Flag were generated. After selection (DMEM +  
651 10% FBS + 200 µg/ml hygromycin B), 10 x 150 cm<sup>2</sup> plates of subconfluent (60%) cells were  
652 incubated for 24 hours in complete media supplemented with 1 µg/ml tetracycline and 50 µM  
653 biotin. Five plates were treated with 5 µM MG132. Cells were collected and pelleted (2000 rpm,  
654 3 min), the pellet was washed twice with PBS, and dried pellets were snap frozen. Pellets were  
655 lysed in 10 ml of modified RIPA lysis buffer (50 mM Tris-HCl, 150 mM NaCl, 1 mM EDTA, 1 mM  
656 EGTA, 1% Triton X-100, 0.1% SDS, 1:500 protease inhibitor cocktail, 250U Turbonuclease, pH  
657 7.5) at 4°C for 1 hour, then sonicated to completely disrupt visible aggregates. The lysates were  
658 centrifuged at 35,000 g for 30 min. Clarified supernatants were incubated with 30 µl packed,  
659 pre-equilibrated Streptavidin-sepharose beads at 4°C for 3 hours. Beads were collected by

660 centrifugation, washed 6 times with 50 mM ammonium bicarbonate pH 8.2, and treated with  
661 TPCK-trypsin (16 hours at 37C). The supernatant containing the tryptic peptides was collected  
662 and lyophilized. Peptides were resuspended in 0.1% formic acid and 1/6<sup>th</sup> of the sample was  
663 analyzed per MS run.

664       Liquid chromatography (LC) analytical columns (75  $\mu$ m inner diameter) and pre-columns  
665 (100  $\mu$ m ID) were made in-house from fused silica capillary tubing from InnovaQuartz and  
666 packed with 100 $\text{\AA}$  C<sub>18</sub>-coated silica particles. LC-MS/MS was conducted using a 120 min  
667 reversed-phase buffer gradient running at 250 nl/min (column heated at 35C) on a Proxeon  
668 EASY-nLC pump in-line with a hybrid LTQ-Orbitrap Velos mass spectrometer. A parent ion scan  
669 was performed in the Orbitrap, using a resolving power of 60000. Simultaneously, up to the 20  
670 most intense peaks were selected for MS/MS (minimum ion count of 1000 for activation) using  
671 standard CID fragmentation. Fragment ions were detected in the LTQ. Dynamic exclusion was  
672 activated such that MS/MS of the same *m/z* (within a 10 ppm window, exclusion list size 500)  
673 detected 3 times within 45 sec were excluded from analysis for 30 sec. For protein  
674 identification, .RAW files were converted to the mzXML format using Proteowizard, then  
675 searched using X!Tandem against human RefSeq Version 45 (containing 36113 entries). Search  
676 parameters specified a parent MS tolerance of 15 ppm and an MS/MS fragment ion tolerance  
677 of 0.4 Da, with up to 2 missed cleavages allowed for trypsin. Oxidation of the methionine was  
678 allowed as a variable modification. Data were analyzed using the trans-proteomic pipeline via  
679 the ProHits 2.0.0 software suite. Proteins identified with a ProteinProphet cut-off of 0.85  
680 (corresponding to  $\leq 1\%$  FDR) were analyzed with SAINT Express v.3.3. Sixteen control runs were  
681 used for comparative purposes, comprising 8 runs of BioID conducted on untransfected 293T-  
682 REx cells. In each case, 4 runs were conducted on untreated cells, and 4 runs were conducted in  
683 cells treated with MG132, as above. The 16 controls were collapsed to the highest 4 spectral  
684 counts for each hit. All raw mass spectrometry data have been uploaded to the Massive archive  
685 (ucsd.edu), ID: MSVxxxx, password: MAPL.

686

687

688 **Histology**



689 Formaldehyde-fixed, paraffin-embedded tissues were cut into 4µm sections and stained with  
690 hematoxylin and eosin (H&E).

691

## 692 **RNA isolation and qRT-PCR**

693 Total RNAs from various tissues were prepared using TRIzol (Invitrogen). They were treated  
694 with DNase (New England Biolabs), then reverse transcribed with random primers using the  
695 High Capacity sDNA Reverse Transcription Kit (Life Technologies) as described by the  
696 manufacturer. Before use, RT samples were diluted 1:5. Gene expression was determined using  
697 assays designed with the Universal Probe Library (UPL) from Roche  
698 ([www.universalprobelibrary.com](http://www.universalprobelibrary.com)). For each qPCR assay, a standard curve was performed to  
699 ensure the efficacy of the assay is between 90% and 110%. qPCR reactions were performed  
700 using 5-25 ng of cDNA samples, the TaqMan Advanced Fast Universal PCR Master Mix (Life  
701 Technologies), 2 µM of each primer and 1µM of the corresponding UPL probe. The Viia7 qPCR  
702 instrument (Life Technologies) was used to detect the amplification level and was programmed  
703 with an initial step of 3 min at 95°C, followed by 40 cycles of: 5 sec at 95°C and 30 sec at 60°C.  
704 All reactions were run in triplicate and the average values of Cts were used for quantification.  
705 The relative quantification of target genes was determined using the  $\Delta\Delta CT$  method. Briefly, the  
706 Ct (threshold cycle) values of target genes were normalized to an endogenous control gene  
707 ( $\Delta CT = Ct_{\text{target}} - Ct_{\text{CTRL}}$ ) and compared with a calibrator:  $\Delta\Delta CT = \Delta Ct_{\text{Sample}} - \Delta Ct_{\text{Calibrator}}$ . Relative  
708 expression (RQ) was calculated using the Sequence Detection System (SDS) 2.2.2 software  
709 (Applied Biosystems) and the formula is  $RQ = 2^{-\Delta\Delta CT}$ .

710 qRT-PCR primers used (5' to 3'):

711

| Gene Symbol     | UPL probe | Fwd                    | Rev                   |
|-----------------|-----------|------------------------|-----------------------|
| <i>Fgf21</i>    | 67        | agatggagctctctatggatcg | gggcttcagactggtacacat |
| <i>Ppara</i>    | 41        | cacgcatgtgaaggctgtaa   | gctccgatcacacttgtcg   |
| <i>Acadl</i>    | 75        | gcttatgaatgtgtgcaactcc | ccgagcatccacgtaagc    |
| <i>Ppargc1a</i> | 29        | gaaagggccaaacagagaga   | gtaaatacacacggcgctctt |

|                |     |                         |                         |
|----------------|-----|-------------------------|-------------------------|
| <i>Cpt1b</i>   | 92  | gagtgactggtgggaagaatg   | gctgctgcacatttggtt      |
| <i>Acadm</i>   | 110 | agtaccctgtggagaagctgat  | tcaatgtgctcacgagctatg   |
| <i>Ucp1</i>    | 34  | ggcctctacgactcagtcca    | taagccggctgagatcttgt    |
| <i>Ucp2</i>    | 2   | acagccttctgcactcctg     | ggctgggagacgaaact       |
| <i>Ucp3</i>    | 69  | taccaaccttggttagacg     | gtccgaggagagagcttgc     |
| <i>Hsd3b5</i>  | 17  | cgctccagacagaccatc      | gatgaatgttgccactgg      |
| <i>Cyp7b1</i>  | 99  | aattggacagcttggtctgc    | ttctcggatgatgctggagt    |
| <i>Cyp27a1</i> | 27  | tctaccacctgccttgaa      | gcagtgtcctcaggaatgg     |
| <i>Cyp7a1</i>  | 92  | gatcctctgggcatctcaag    | agaggctgcttcattgctt     |
| <i>Cyp8b1</i>  | 85  | tctgagcttattcggctaca    | cggaacttctgaacagctc     |
| <i>Cyp3a1</i>  | 53  | gggactcgtaaacatgaactttt | ccatgtcgaattccataaacc   |
| <i>Cyp4a14</i> | 7   | catggcggactctgtcaata    | gatctccagagggtggtcct    |
| <i>Cyp2b9</i>  | 91  | ggaatgggaaagcggagt      | gaagagaaaggtgggatccag   |
| <i>Nr1h4</i>   | 100 | caaaatgactcaggaggagtacg | tccttgatgtattgtctgtctgg |
| <i>Abcd3</i>   | 91  | tgttcaggactggatggatg    | tgataaaacagtcttgccatcg  |

712

### 713 **Statistical analysis**

714 Normal distribution and homoscedasticity of data were tested by Shapiro-Wilks and Bartlett  
715 tests respectively. Parametric tests were used if distributions normal and variances equal.

716 Student t-test was used to compare 2 groups on 1 variable. One-way analysis of variance  
717 (ANOVA) for univariate multiple comparisons or Two-way ANOVA (for bivariate comparisons)  
718 were followed by Tukey's honest significant difference post-hoc test. Statistical analyses were  
719 performed using GraphPad Prism software (San Diego, CA). Threshold for statistical significance  
720 was  $P < 0.05$ .

721 All values are expressed as mean  $\pm$  SEM

722

723

724 **Acknowledgements**

725 This study was funded by Canadian Institute of Health Research and the Canadian Cancer  
726 Society Research Institute (to HMM; CIHR#68833, CCSRI#702139). Work in the BR lab was  
727 funded by CIHR #130340. HMM holds the Canada Research Chair in Mitochondrial Cell Biology.  
728 BR holds the Canada Research Chair in Proteomics and Molecular Medicine. ABP was supported  
729 by a postdoctoral fellowship from Fonds de Recherche Québec - Santé. The authors would like  
730 to thank the IRIC for qRT-PCR services and Ozgene (Australia) for services in the design and  
731 generation of the floxed MAPL strain. We also thank Dr. Atilla Omeroglu (McGill University) for  
732 help with histological analysis, Nancy Braverman (McGill University) for advice on bile acid  
733 metabolism, and Tharan Srikumar for mass spectrometry technical assistance and the MNI  
734 animal care services.

735

## 736 **References**

- 737 Ambivero, C.T., Cilenti, L., Main, S., Zervos, A.S., 2014. Mulan E3 ubiquitin ligase interacts with  
738 multiple E2 conjugating enzymes and participates in mitophagy by recruiting GABARAP.  
739 *Cell Signal* 26, 2921–2929. <https://doi.org/10.1016/j.cellsig.2014.09.004>
- 740 Anakk, S., Bhosale, M., Schmidt, V.A., Johnson, R.L., Finegold, M.J., Moore, D.D., 2013. Bile Acids  
741 Activate YAP to Promote Liver Carcinogenesis. *Cell Reports* 5, 1060–1069.  
742 <https://doi.org/10.1016/j.celrep.2013.10.030>
- 743 Barry, R., John, S.W., Liccardi, G., Tenev, T., Jaco, I., Chen, C.-H., Choi, J., Kasperkiewicz, P.,  
744 Fernandes-Alnemri, T., Alnemri, E., Drag, M., Chen, Y., Meier, P., 2018. SUMO-mediated  
745 regulation of NLRP3 modulates inflammasome activity. *Nat Commun* 9, 3001.  
746 <https://doi.org/10.1038/s41467-018-05321-2>
- 747 Bingol, B., Tea, J.S., Phu, L., Reichelt, M., Bakalarski, C.E., Song, Q., Foreman, O., Kirkpatrick,  
748 D.S., Sheng, M., 2014. The mitochondrial deubiquitinase USP30 opposes parkin-  
749 mediated mitophagy. *Nature* 510, 370–375. <https://doi.org/10.1038/nature13418>
- 750 Bochkis, I.M., Rubins, N.E., White, P., Furth, E.E., Friedman, J.R., Kaestner, K.H., 2008.  
751 Hepatocyte-specific ablation of *Foxa2* alters bile acid homeostasis and results in  
752 endoplasmic reticulum stress. *Nat Med* 14, 828–836. <https://doi.org/10.1038/nm.1853>
- 753 BonDurant, L.D., Potthoff, M.J., 2018. Fibroblast Growth Factor 21: A Versatile Regulator of  
754 Metabolic Homeostasis. *Annu Rev Nutr* 38, 173–196. <https://doi.org/10.1146/annurev-nutr-071816-064800>
- 755
- 756 Bookout, A.L., de Groot, M.H.M., Owen, B.M., Lee, S., Gautron, L., Lawrence, H.L., Ding, X.,  
757 Elmquist, J.K., Takahashi, J.S., Mangelsdorf, D.J., Kliewer, S.A., 2013. FGF21 regulates  
758 metabolism and circadian behavior by acting on the nervous system. *Nat Med* 19, 1147–  
759 1152. <https://doi.org/10.1038/nm.3249>
- 760 Bosma, P.J., Seppen, J., Goldhoorn, B., Bakker, C., Oude Elferink, R.P., Chowdhury, J.R.,  
761 Chowdhury, N.R., Jansen, P.L., 1994. Bilirubin UDP-glucuronosyltransferase 1 is the only  
762 relevant bilirubin glucuronidating isoform in man. *J Biol Chem* 269, 17960–17964.
- 763 Braschi, E., Goyon, V., Zunino, R., Mohanty, A., Xu, L., McBride, H.M., 2010. Vps35 Mediates  
764 Vesicle Transport between the Mitochondria and Peroxisomes. *Current Biology* 20,  
765 1310–1315. <https://doi.org/10.1016/j.cub.2010.05.066>
- 766 Braschi, E., Zunino, R., McBride, H.M., 2009. MAPL is a new mitochondrial SUMO E3 ligase that  
767 regulates mitochondrial fission. *EMBO Rep* 10, 748–754.  
768 <https://doi.org/10.1038/embor.2009.86>
- 769 Chen, M.M., Hale, C., Stanislaus, S., Xu, J., Véniant, M.M., 2018. FGF21 acts as a negative  
770 regulator of bile acid synthesis. *J Endocrinol* 237, 139–152. [https://doi.org/10.1530/JOE-](https://doi.org/10.1530/JOE-17-0727)  
771 [17-0727](https://doi.org/10.1530/JOE-17-0727)
- 772 Chiang, J.Y.L., 2009. Bile acids: regulation of synthesis. *J Lipid Res* 50, 1955–1966.  
773 <https://doi.org/10.1194/jlr.R900010-JLR200>
- 774 Comartin, D., Gupta, G.D., Fussner, E., Coyaud, É., Hasegan, M., Archinti, M., Cheung, S.W.T.,  
775 Pinchev, D., Lawo, S., Raught, B., Bazett-Jones, D.P., Lüders, J., Pelletier, L., 2013. CEP120  
776 and SPICE1 cooperate with CPAP in centriole elongation. *Curr Biol* 23, 1360–1366.  
777 <https://doi.org/10.1016/j.cub.2013.06.002>

- 778 Coyaud, E., Mis, M., Laurent, E.M.N., Dunham, W.H., Couzens, A.L., Robitaille, M., Gingras, A.-C.,  
779 Angers, S., Raught, B., 2015. BioID-based Identification of Skp Cullin F-box (SCF) $\beta$ -  
780 TrCP1/2 E3 Ligase Substrates. *Mol Cell Proteomics* 14, 1781–1795.  
781 <https://doi.org/10.1074/mcp.M114.045658>
- 782 Cyphert, H.A., Ge, X., Kohan, A.B., Salati, L.M., Zhang, Y., Hillgartner, F.B., 2012. Activation of  
783 the farnesoid X receptor induces hepatic expression and secretion of fibroblast growth  
784 factor 21. *J Biol Chem* 287, 25123–25138. <https://doi.org/10.1074/jbc.M112.375907>
- 785 de Boer, J.F., Bloks, V.W., Verkade, E., Heiner-Fokkema, M.R., Kuipers, F., 2018. New insights in  
786 the multiple roles of bile acids and their signaling pathways in metabolic control. *Curr*  
787 *Opin Lipidol* 29, 194–202. <https://doi.org/10.1097/MOL.0000000000000508>
- 788 Doiron, K., Goyon, V., Coyaud, E., Rajapakse, S., Raught, B., McBride, H.M., 2017. The dynamic  
789 interacting landscape of MAPL reveals essential functions for SUMOylation in innate  
790 immunity. *Sci Rep* 7, 107. <https://doi.org/10.1038/s41598-017-00151-6>
- 791 Donepudi, A.C., Boehme, S., Li, F., Chiang, J.Y.L., 2017. G-protein-coupled bile acid receptor  
792 plays a key role in bile acid metabolism and fasting-induced hepatic steatosis in mice.  
793 *Hepatology* 65, 813–827. <https://doi.org/10.1002/hep.28707>
- 794 Escobar-Henriques, M., Langer, T., 2014. Dynamic survey of mitochondria by ubiquitin. *EMBO*  
795 *Reports* 15, 231. <https://doi.org/10.1002/embr.201338225>
- 796 Ferdinandusse, S., Jimenez-Sanchez, G., Koster, J., Denis, S., Van Roermund, C.W., Silva-Zolezzi,  
797 I., Moser, A.B., Visser, W.F., Gulluoglu, M., Durmaz, O., Demirkol, M., Waterham, H.R.,  
798 Gökçay, G., Wanders, R.J.A., Valle, D., 2015. A novel bile acid biosynthesis defect due to  
799 a deficiency of peroxisomal ABCD3. *Hum Mol Genet* 24, 361–370.  
800 <https://doi.org/10.1093/hmg/ddu448>
- 801 Flippo, K.H., Potthoff, M.J., 2021. Metabolic Messengers: FGF21. *Nat Metab* 3, 309–317.  
802 <https://doi.org/10.1038/s42255-021-00354-2>
- 803 Guimarães, C.P., Domingues, P., Aubourg, P., Fouquet, F., Pujol, A., Jimenez-Sanchez, G., Sá-  
804 Miranda, C., Azevedo, J.E., 2004. Mouse liver PMP70 and ALDP: homomeric interactions  
805 prevail in vivo. *Biochim Biophys Acta* 1689, 235–243.  
806 <https://doi.org/10.1016/j.bbadis.2004.04.001>
- 807 Han, J., Liu, Y., Wang, R., Yang, J., Ling, V., Borchers, C.H., 2015. Metabolic profiling of bile acids  
808 in human and mouse blood by LC-MS/MS in combination with phospholipid-depletion  
809 solid-phase extraction. *Anal Chem* 87, 1127–1136. <https://doi.org/10.1021/ac503816u>
- 810 He, J., Cheng, J., Wang, T., 2020. SUMOylation-Mediated Response to Mitochondrial Stress.  
811 *IJMS* 21, 5657. <https://doi.org/10.3390/ijms21165657>
- 812 Hecker, C.-M., Rabiller, M., Haglund, K., Bayer, P., Dikic, I., 2006. Specification of SUMO1- and  
813 SUMO2-interacting motifs. *J Biol Chem* 281, 16117–16127.  
814 <https://doi.org/10.1074/jbc.M512757200>
- 815 Hetz, C., 2012. The unfolded protein response: controlling cell fate decisions under ER stress  
816 and beyond. *Nat Rev Mol Cell Biol* 13, 89–102. <https://doi.org/10.1038/nrm3270>
- 817 Itoh, N., 2014. FGF21 as a Hepatokine, Adipokine, and Myokine in Metabolism and Diseases.  
818 *Front Endocrinol (Lausanne)* 5, 107. <https://doi.org/10.3389/fendo.2014.00107>
- 819 Jenkins, K., Khoo, J.J., Sadler, A., Piganis, R., Wang, D., Borg, N.A., Hjerrild, K., Gould, J., Thomas,  
820 B.J., Nagley, P., Hertzog, P.J., Mansell, A., 2013. Mitochondrially localised MUL1 is a

- 821 novel modulator of antiviral signaling. *Immunol Cell Biol* 91, 321–330.  
822 <https://doi.org/10.1038/icb.2013.7>
- 823 Jung, J.H., Bae, S., Lee, J.Y., Woo, S.R., Cha, H.J., Yoon, Y., Suh, K.-S., Lee, S.-J., Park, I.-C., Jin, Y.-  
824 W., Lee, K.-H., An, S., Lee, J.H., 2011. E3 ubiquitin ligase Hades negatively regulates the  
825 exonuclear function of p53. *Cell Death Differ* 18, 1865–1875.  
826 <https://doi.org/10.1038/cdd.2011.57>
- 827 Köntgen, F., Süß, G., Stewart, C., Steinmetz, M., Bluethmann, H., 1993. Targeted disruption of  
828 the MHC class II Aa gene in C57BL/6 mice. *Int Immunol* 5, 957–964.  
829 <https://doi.org/10.1093/intimm/5.8.957>
- 830 Kraus, F., Ryan, M.T., 2017. The constriction and scission machineries involved in mitochondrial  
831 fission. *J Cell Sci* 130, 2953–2960. <https://doi.org/10.1242/jcs.199562>
- 832 Li, J., Qi, W., Chen, G., Feng, D., Liu, J., Ma, B., Zhou, C., Mu, C., Zhang, W., Chen, Q., Zhu, Y.,  
833 2015. Mitochondrial outer-membrane E3 ligase MUL1 ubiquitinates ULK1 and regulates  
834 selenite-induced mitophagy. *Autophagy* 11, 1216–1229.  
835 <https://doi.org/10.1080/15548627.2015.1017180>
- 836 Li, W., Bengtson, M.H., Ulbrich, A., Matsuda, A., Reddy, V.A., Orth, A., Chanda, S.K., Batalov, S.,  
837 Joazeiro, C.A.P., 2008. Genome-wide and functional annotation of human E3 ubiquitin  
838 ligases identifies MULAN, a mitochondrial E3 that regulates the organelle’s dynamics  
839 and signaling. *PLoS One* 3, e1487. <https://doi.org/10.1371/journal.pone.0001487>
- 840 Lorbek, G., Lewinska, M., Rozman, D., 2012. Cytochrome P450s in the synthesis of cholesterol  
841 and bile acids—from mouse models to human diseases. *FEBS J* 279, 1516–1533.  
842 <https://doi.org/10.1111/j.1742-4658.2011.08432.x>
- 843 Marcassa, E., Kallinos, A., Jardine, J., Rusilowicz-Jones, E.V., Martinez, A., Kuehl, S., Islinger, M.,  
844 Clague, M.J., Urbé, S., 2018. Dual role of USP30 in controlling basal pexophagy and  
845 mitophagy. *EMBO Rep* 19, e45595. <https://doi.org/10.15252/embr.201745595>
- 846 Mohanty, A., Zunino, R., Soubannier, V., Dilipkumar, S., 2021. A new functional role of  
847 mitochondria-anchored protein ligase in peroxisome morphology in mammalian cells. *J*  
848 *Cell Biochem* 122, 1686–1700. <https://doi.org/10.1002/jcb.30114>
- 849 Neuspiel, M., Schauss, A.C., Braschi, E., Zunino, R., Rippstein, P., Rachubinski, R.A., Andrade-  
850 Navarro, M.A., McBride, H.M., 2008. Cargo-selected transport from the mitochondria to  
851 peroxisomes is mediated by vesicular carriers. *Curr Biol* 18, 102–108.  
852 <https://doi.org/10.1016/j.cub.2007.12.038>
- 853 Ni, G., Konno, H., Barber, G.N., 2017. Ubiquitination of STING at lysine 224 controls IRF3  
854 activation. *Sci Immunol* 2, eaah7119. <https://doi.org/10.1126/sciimmunol.aah7119>
- 855 Nunnari, J., Suomalainen, A., 2012. Mitochondria: in sickness and in health. *Cell* 148, 1145–  
856 1159. <https://doi.org/10.1016/j.cell.2012.02.035>
- 857 Owen, B.M., Ding, X., Morgan, D.A., Coate, K.C., Bookout, A.L., Rahmouni, K., Kliewer, S.A.,  
858 Mangelsdorf, D.J., 2014. FGF21 acts centrally to induce sympathetic nerve activity,  
859 energy expenditure, and weight loss. *Cell Metab* 20, 670–677.  
860 <https://doi.org/10.1016/j.cmet.2014.07.012>
- 861 Pan, X., Shao, Y., Wu, F., Wang, Yuan, Xiong, R., Zheng, J., Tian, H., Wang, B., Wang, Yanfang,  
862 Zhang, Y., Han, Z., Qu, A., Xu, H., Lu, A., Yang, T., Li, X., Xu, A., Du, J., Lin, Z., 2018. FGF21  
863 Prevents Angiotensin II-Induced Hypertension and Vascular Dysfunction by Activation of

- 864 ACE2/Angiotensin-(1-7) Axis in Mice. *Cell Metab* 27, 1323-1337.e5.  
865 <https://doi.org/10.1016/j.cmet.2018.04.002>
- 866 Patel, R., Bookout, A.L., Magomedova, L., Owen, B.M., Consiglio, G.P., Shimizu, M., Zhang, Y.,  
867 Mangelsdorf, D.J., Kliewer, S.A., Cummins, C.L., 2015. Glucocorticoids regulate the  
868 metabolic hormone FGF21 in a feed-forward loop. *Mol Endocrinol* 29, 213–223.  
869 <https://doi.org/10.1210/me.2014-1259>
- 870 Prudent, J., Zunino, R., Sugiura, A., Mattie, S., Shore, G.C., McBride, H.M., 2015. MAPL  
871 SUMOylation of Drp1 Stabilizes an ER/Mitochondrial Platform Required for Cell Death.  
872 *Molecular Cell* 59, 941–955. <https://doi.org/10.1016/j.molcel.2015.08.001>
- 873 Ranea-Robles, P., Chen, H., Stauffer, B., Yu, C., Bhattacharya, D., Friedman, S.L., Puchowicz, M.,  
874 Houten, S.M., 2021. The peroxisomal transporter ABCD3 plays a major role in hepatic  
875 dicarboxylic fatty acid metabolism and lipid homeostasis. *J Inherit Metab Dis*.  
876 <https://doi.org/10.1002/jimd.12440>
- 877 Rojansky, R., Cha, M.-Y., Chan, D.C., 2016. Elimination of paternal mitochondria in mouse  
878 embryos occurs through autophagic degradation dependent on PARKIN and MUL1. *Elife*  
879 5, e17896. <https://doi.org/10.7554/eLife.17896>
- 880 Roux, K.J., 2013. Marked by association: techniques for proximity-dependent labeling of  
881 proteins in eukaryotic cells. *Cell Mol Life Sci* 70, 3657–3664.  
882 <https://doi.org/10.1007/s00018-013-1287-3>
- 883 Roux, K.J., Kim, D.I., Raida, M., Burke, B., 2012. A promiscuous biotin ligase fusion protein  
884 identifies proximal and interacting proteins in mammalian cells. *J Cell Biol* 196, 801–810.  
885 <https://doi.org/10.1083/jcb.201112098>
- 886 Salminen, A., Kaarniranta, K., Kauppinen, A., 2017. Integrated stress response stimulates FGF21  
887 expression: Systemic enhancer of longevity. *Cell Signal* 40, 10–21.  
888 <https://doi.org/10.1016/j.cellsig.2017.08.009>
- 889 Song, P., Zechner, C., Hernandez, G., Cánovas, J., Xie, Y., Sondhi, V., Wagner, M., Stadlbauer, V.,  
890 Horvath, A., Leber, B., Hu, M.C., Moe, O.W., Mangelsdorf, D.J., Kliewer, S.A., 2018. The  
891 Hormone FGF21 Stimulates Water Drinking in Response to Ketogenic Diet and Alcohol.  
892 *Cell Metab* 27, 1338-1347.e4. <https://doi.org/10.1016/j.cmet.2018.04.001>
- 893 Sorrentino, G., Perino, A., Yildiz, E., El Alam, G., Bou Sleiman, M., Gioiello, A., Pellicciari, R.,  
894 Schoonjans, K., 2020. Bile Acids Signal via TGR5 to Activate Intestinal Stem Cells and  
895 Epithelial Regeneration. *Gastroenterology* 159, 956-968.e8.  
896 <https://doi.org/10.1053/j.gastro.2020.05.067>
- 897 Stiles, A.R., McDonald, J.G., Bauman, D.R., Russell, D.W., 2009. CYP7B1: one cytochrome P450,  
898 two human genetic diseases, and multiple physiological functions. *J Biol Chem* 284,  
899 28485–28489. <https://doi.org/10.1074/jbc.R109.042168>
- 900 Tait, S.W.G., Green, D.R., 2012. Mitochondria and cell signalling. *Journal of Cell Science* 125,  
901 807–815. <https://doi.org/10.1242/jcs.099234>
- 902 Tan, J.X., Finkel, T., 2020. Mitochondria as intracellular signaling platforms in health and  
903 disease. *Journal of Cell Biology* 219, e202002179.  
904 <https://doi.org/10.1083/jcb.202002179>
- 905 van Roermund, C.W.T., Ijlst, L., Wagemans, T., Wanders, R.J.A., Waterham, H.R., 2014. A role for  
906 the human peroxisomal half-transporter ABCD3 in the oxidation of dicarboxylic acids.  
907 *Biochim Biophys Acta* 1841, 563–568. <https://doi.org/10.1016/j.bbali.2013.12.001>

- 908 Veniant, M.M., Sivits, G., Helmering, J., Komorowski, R., Lee, J., Fan, W., Moyer, C., Lloyd, D.J.,  
909 2015. Pharmacologic Effects of FGF21 Are Independent of the “Browning” of White  
910 Adipose Tissue. *Cell Metab* 21, 731–738. <https://doi.org/10.1016/j.cmet.2015.04.019>
- 911 Wagner, M., Halilbasic, E., Marschall, H.-U., Zollner, G., Fickert, P., Langner, C., Zatloukal, K.,  
912 Denk, H., Trauner, M., 2005. CAR and PXR agonists stimulate hepatic bile acid and  
913 bilirubin detoxification and elimination pathways in mice. *Hepatology* 42, 420–430.  
914 <https://doi.org/10.1002/hep.20784>
- 915 Wanders, R.J.A., 2013. Peroxisomes in human health and disease: metabolic pathways,  
916 metabolite transport, interplay with other organelles and signal transduction. *Subcell*  
917 *Biochem* 69, 23–44. [https://doi.org/10.1007/978-94-007-6889-5\\_2](https://doi.org/10.1007/978-94-007-6889-5_2)
- 918 Wang, Y., Yutuc, E., Griffiths, W.J., 2021. Cholesterol metabolism pathways - are the  
919 intermediates more important than the products? *FEBS J* 288, 3727–3745.  
920 <https://doi.org/10.1111/febs.15727>
- 921 Worthmann, A., John, C., Rühlemann, M.C., Baguhl, M., Heinsen, F.-A., Schaltenberg, N., Heine,  
922 M., Schlein, C., Evangelakos, I., Mineo, C., Fischer, M., Dandri, M., Kremoser, C., Scheja,  
923 L., Franke, A., Shaul, P.W., Heeren, J., 2017. Cold-induced conversion of cholesterol to  
924 bile acids in mice shapes the gut microbiome and promotes adaptive thermogenesis.  
925 *Nat Med* 23, 839–849. <https://doi.org/10.1038/nm.4357>
- 926 Yun, J., Puri, R., Yang, H., Lizzio, M.A., Wu, C., Sheng, Z.-H., Guo, M., 2014. MUL1 acts in parallel  
927 to the PINK1/parkin pathway in regulating mitofusin and compensates for loss of  
928 PINK1/parkin. *Elife* 3, e01958. <https://doi.org/10.7554/eLife.01958>
- 929 Zhang, B., Huang, J., Li, H.-L., Liu, T., Wang, Y.-Y., Waterman, P., Mao, A.-P., Xu, L.-G., Zhai, Z.,  
930 Liu, D., Marrack, P., Shu, H.-B., 2008. GIDE is a mitochondrial E3 ubiquitin ligase that  
931 induces apoptosis and slows growth. *Cell Res* 18, 900–910.  
932 <https://doi.org/10.1038/cr.2008.75>
- 933 Zhang, Y., Xie, Y., Berglund, E.D., Coate, K.C., He, T.T., Katafuchi, T., Xiao, G., Potthoff, M.J., Wei,  
934 W., Wan, Y., Yu, R.T., Evans, R.M., Kliewer, S.A., Mangelsdorf, D.J., 2012. The starvation  
935 hormone, fibroblast growth factor-21, extends lifespan in mice. *Elife* 1, e00065.  
936 <https://doi.org/10.7554/eLife.00065>
- 937  
938



939 **Figures**

Goyon et al., Figure 1

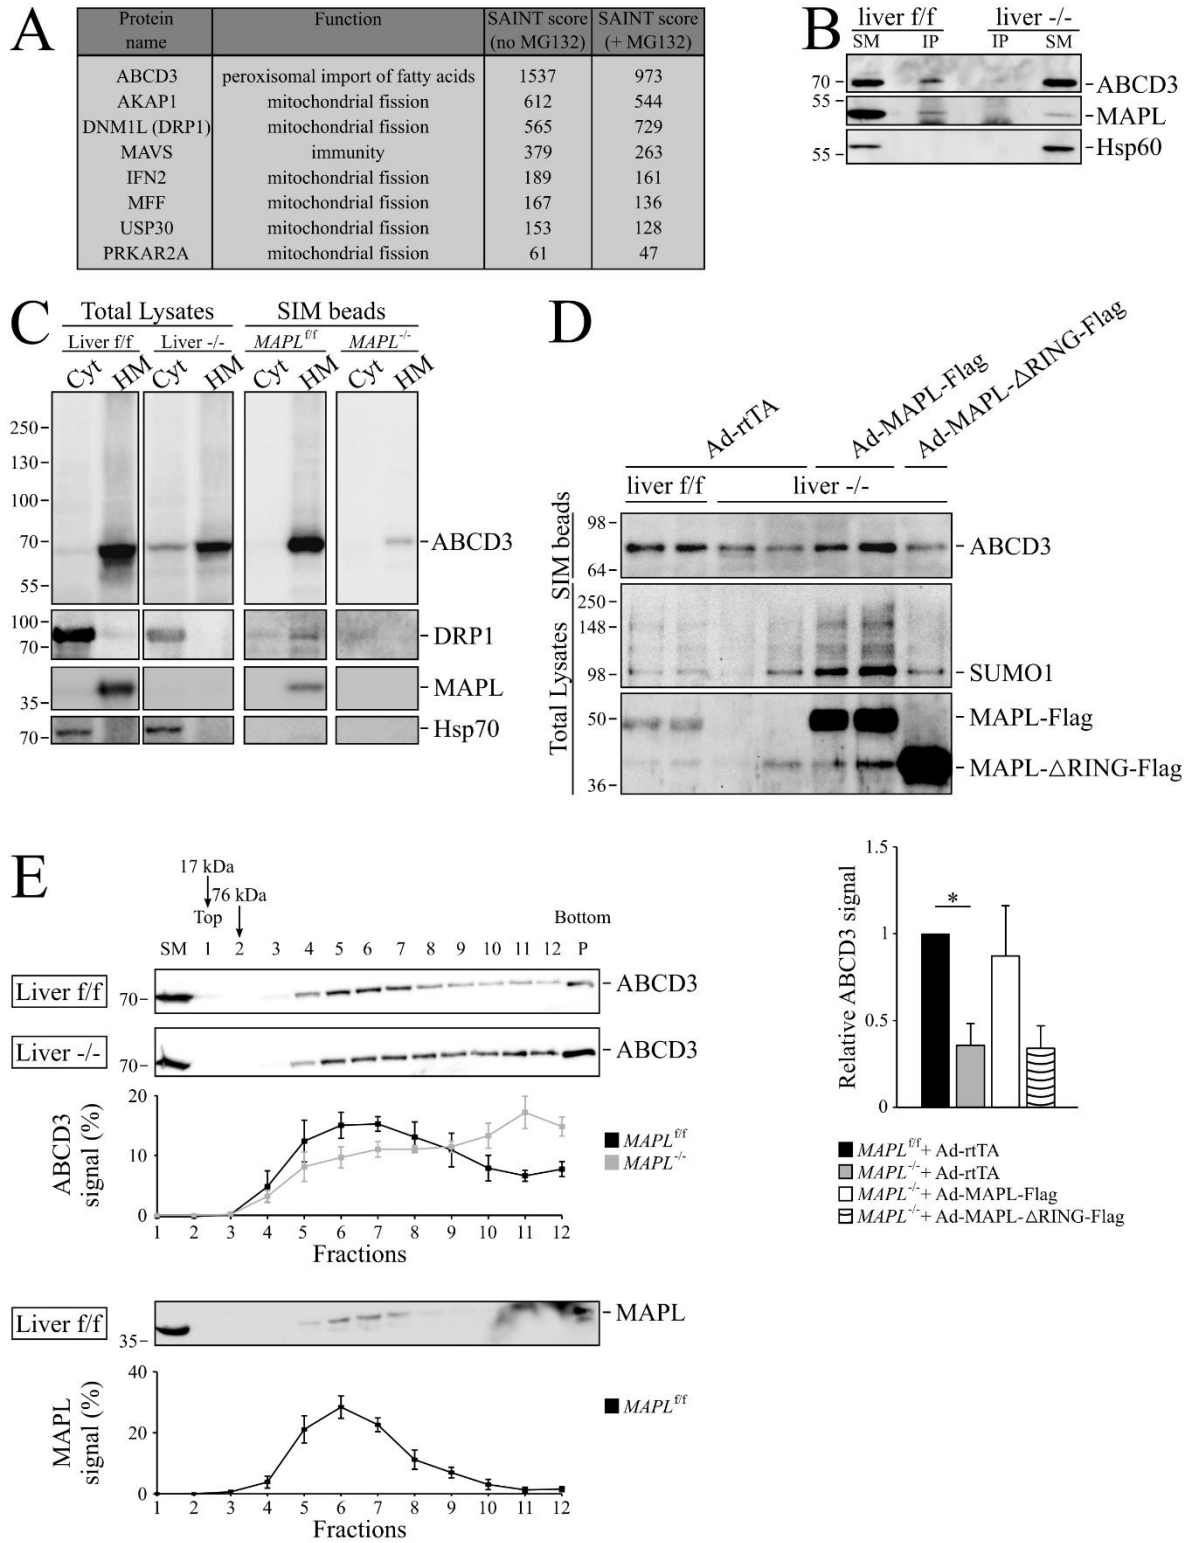

940

941

942 **Figure 1: MAPL SUMOylates ABCD3 and modulates complex assembly.**

943 **A.** HEK293T-REX (tetracycline-regulatable expression) cells stably expressing an inducible Tet-ON  
944 fusion construct MAPL-Flag-BirA or Flag-BirA were induced for 24 hours in the presence of  
945 biotin, and biotinylated proteins were isolated with streptavidin beads for identification by  
946 mass spectrometry. The top hits by peptide counts are shown.

947 **B.** Starting materials (SM) and MAPL immunoprecipitated (IP) fractions obtained from liver  
948 crude extracts were probed for ABCD3, MAPL and Hsp60.

949 **C.** Cytosol and heavy membrane fractions isolated from MAPL<sup>f/f</sup> and MAPL<sup>-/-</sup> livers were  
950 solubilized and incubated with SIM beads, and elution fractions probed for ABCD3, DRP1, Hsp70  
951 and MAPL (Cyt=cytosolic fraction, HM=heavy membrane fraction).

952 **D.** Heavy membrane fractions isolated from livers of MAPL<sup>f/f</sup> and MAPL<sup>-/-</sup> animals tail-vein  
953 injected with adenovirus expressing MAPL-Flag, MAPL-ΔRING-Flag or empty virus (Ad-rtTA)  
954 were solubilized and incubated with SIM beads. Elution fractions were probed for ABCD3,  
955 SUMO1 and MAPL (top panel). Quantification from 3 independent experiments of ABCD3  
956 signals of the heavy membrane SIM-beads elution fraction from livers isolated from rescued  
957 mice (lower panel).

958 **E.** 250 μg of solubilized protein (from MAPL<sup>f/f</sup> and MAPL<sup>-/-</sup> livers) were separated on a 10-50%  
959 (w/v) sucrose gradient. 12 different fractions, as well as the resuspended pellet (P) were  
960 analyzed by western blot. ABCD3 signals from MAPL<sup>f/f</sup> and MAPL<sup>-/-</sup> livers in the different  
961 fractions were quantified and plotted as percentage of the total signal, from 3 biological  
962 replicates.

963 \*  $P < 0.05$  in a one-way ANOVA

964  
965  
966  
967  
968  
969  
970  
971  
972  
973  
974  
975  
976  
977  
978  
979  
980  
981  
982  
983  
984

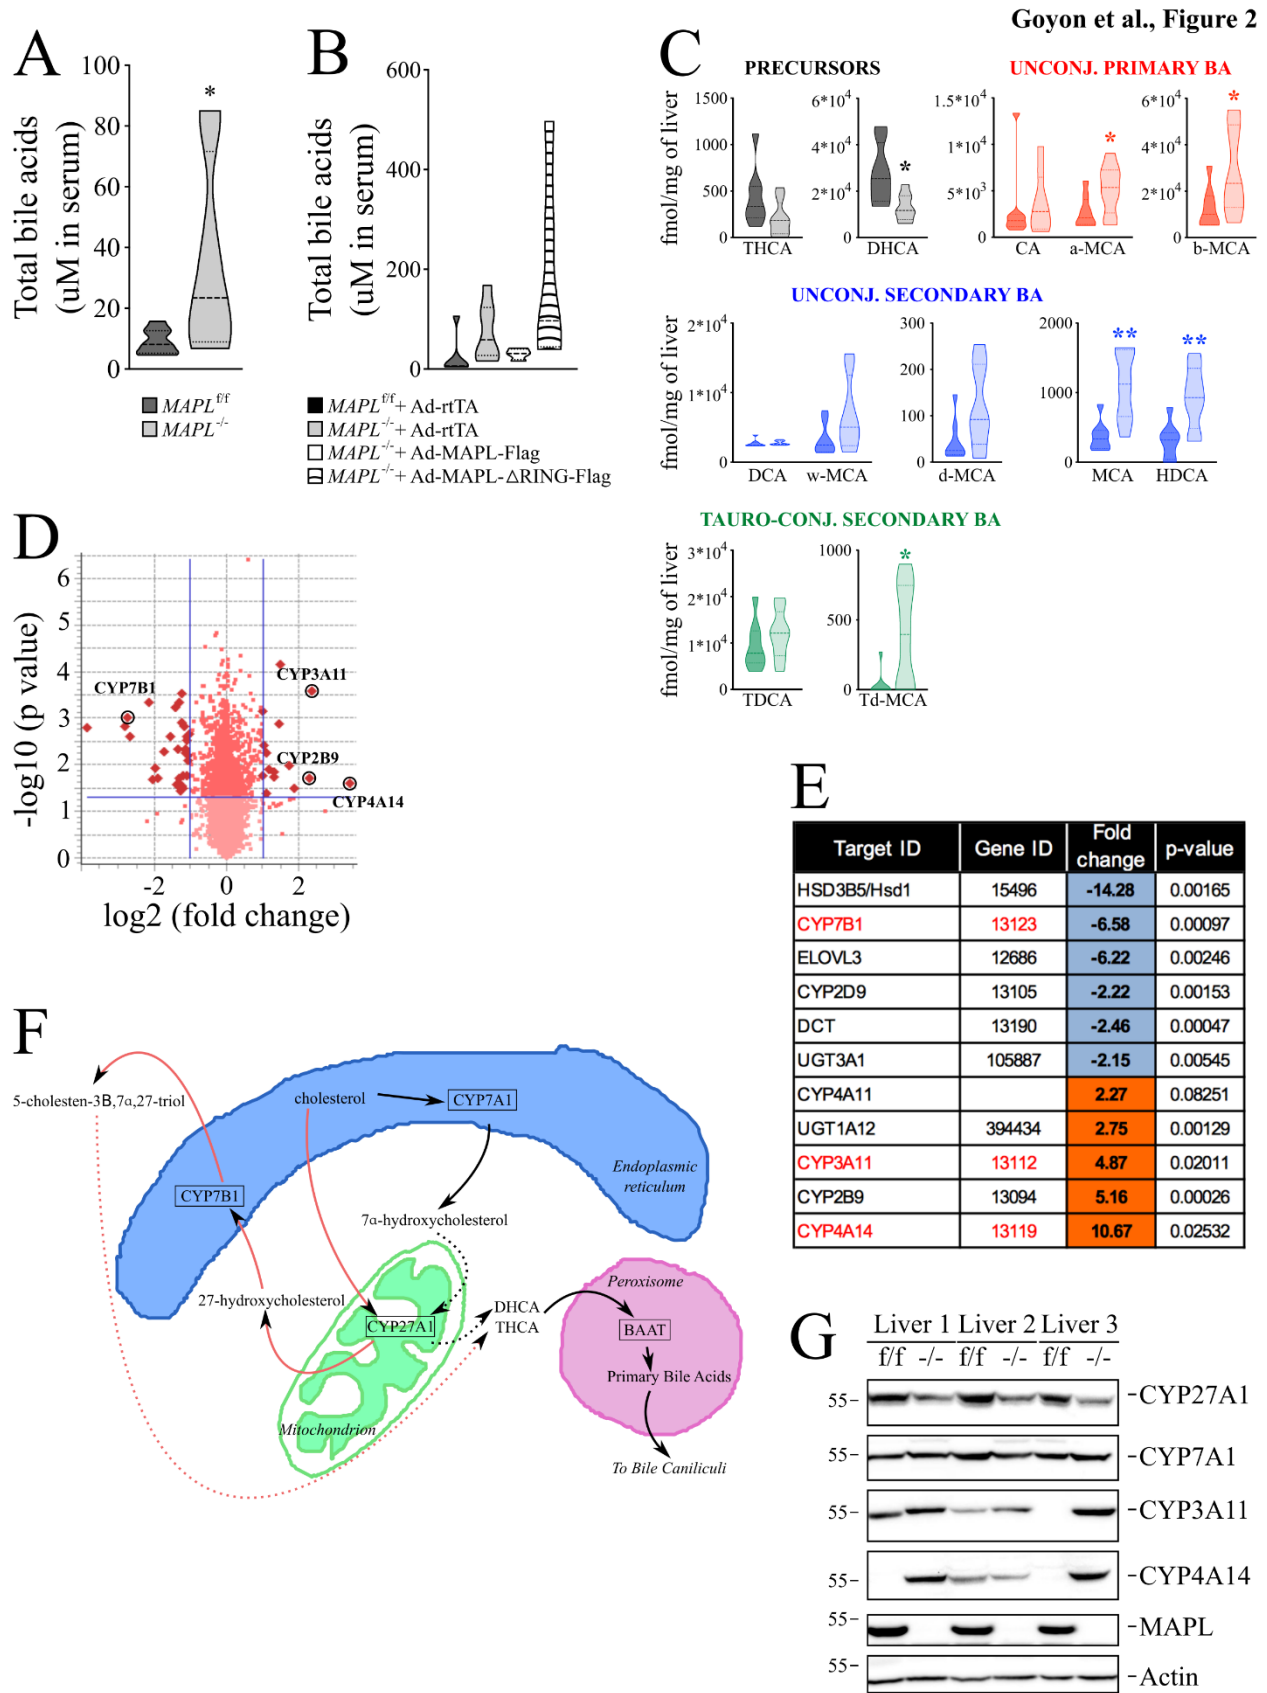

986 **Figure 2: MAPL represses bile acid synthesis.**

987 **A.** Total bile acids within the serum was quantified as described in material and methods (n=8  
988 for each strain, 6 females and 2 males, 2-6 month old).

989 **B.** Total bile acids within the serum of tail vein injected animals was quantified as described in  
990 material and methods (n=6 with 4 females and 2 males, n=7 with 4 females and 3 males, n=4  
991 with 2 females and 2 males and n=5 with 2 females and 3 males, for MAPL<sup>f/f</sup> + rtTA, MAPL<sup>-/-</sup> +  
992 rtTA, MAPL<sup>-/-</sup> + MAPL-Flag and MAPL<sup>-/-</sup> + MAPL-ΔRING-Flag, respectively, 2-3 month old).

993 **C.** Bile acids precursors, as well as unconjugated and conjugated primary and secondary bile  
994 acids were quantified from liver (n=8 for each strain, 2 month old males). THCA and DHCA: tri-  
995 and dihydrocholestanoic acid; CA: cholic acid; a-MCA, b-MCA, w-MCA and d-MCA: α-, β-, γ-  
996 and δ-muricholic acid; DCA: deoxycholic acid; MCA: murocholic acid; HDCA: hyodeoxycholic  
997 acid; TDCA: taurodeoxycholic acid; td-MCA: tauro-δ-muricholic acid.

998 **D.** Volcano plot representation of the Illumina analysis performed on 5-month males (n=3, each  
999 strain, in triplicate). Circles highlight the significant changes in bile acid related enzymes.

1000 **E.** Table resulting from the Illumina analysis (in D) highlighting genes with variations higher than  
1001 2-fold (with a p-value <0.05, calculated with unpaired two-tailed students t-test) implicated in  
1002 steroid and bile acid metabolism.

1003 **F.** A model depicting the required flux of metabolites between the ER, mitochondria and  
1004 peroxisomes to facilitate bile acid synthesis in the liver. The classical pathway is represented  
1005 with black arrows, while the alternative pathway is represented with red arrows.

1006 **G.** Transcriptome results were validated with western blots from whole cell liver extracts from 3  
1007 animals of each strain (one female, two males), as indicated.

1008 \*  $P < 0.05$  \*\*  $P < 0.01$  in an unpaired two-tailed T test

1009

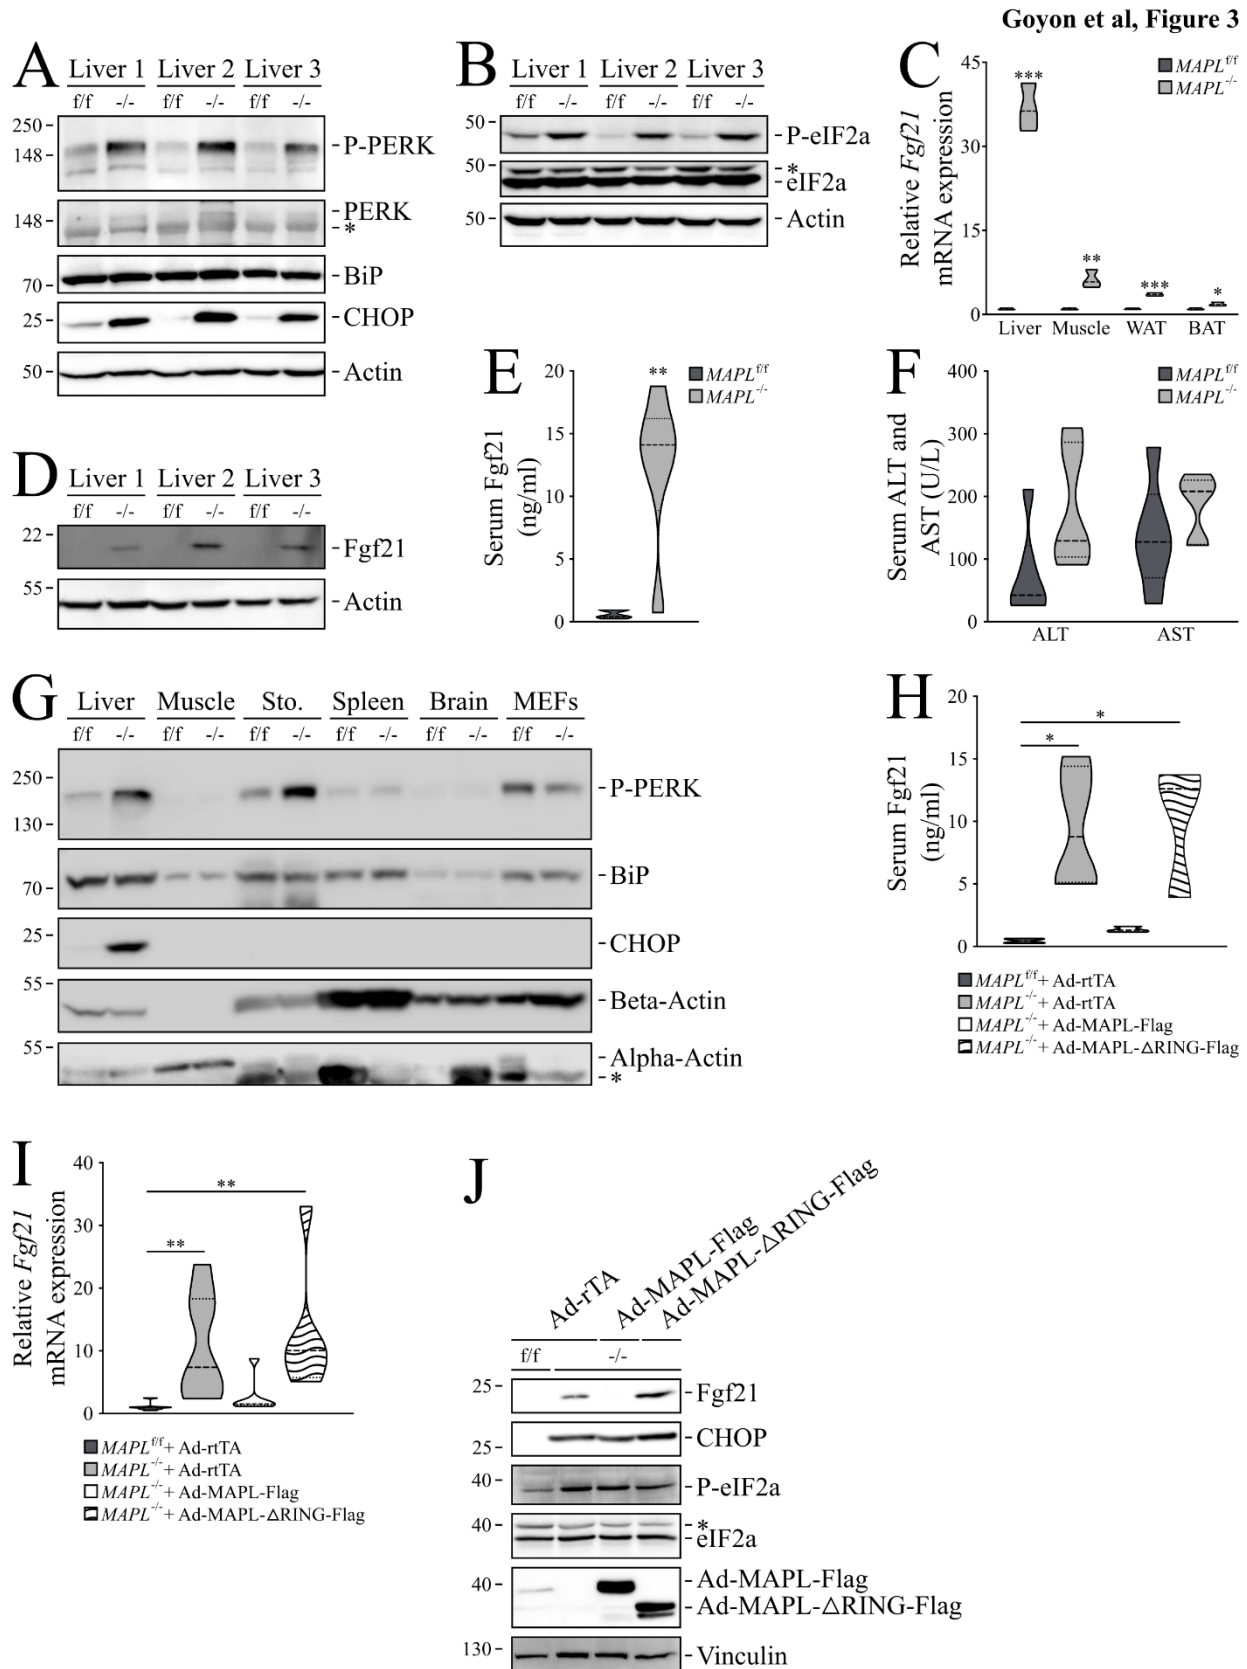

1012

1013 **Figure 3: Loss of MAPL leads to hepatic ER stress, eIF2 $\alpha$  activation and Fgf21 expression.**

1014 **A.** Representative western blots from liver extracts from 3 animals of each strain: PERK auto-  
1015 phosphorylation along with the total protein, as well as BIP and CHOP expression are shown (\*:  
1016 unspecific signal).

1017 **B.** Representative western blots of eIF2 $\alpha$  phosphorylation in liver extracts (n=3).

1018 **C.** *Fgf21* mRNA expression measured by qRT-PCR performed on 4 different mouse tissues  
1019 isolated from MAPL<sup>f/f</sup> and MAPL<sup>-/-</sup> animals.

1020 **D.** Representative western-blots of increased FGF21 protein levels in liver from 3 pairs of mice  
1021 from each strain (left panel).

1022 **E.** Serum FGF21 was quantified by ELISA (n=8 for each strain, 2 month old males).

1023 **F.** Levels of alanine transaminase (ALT) and aspartate transaminase (AST) (n=6, 6 month old  
1024 males).

1025 **G.** Representative western blots from different tissues whole cell extracts from 1 male of each  
1026 strain: PERK auto-phosphorylation, as well as BIP and CHOP expression are shown (Sto:  
1027 stomach, \*: remaining beta actin signal).

1028 **H.** Serum FGF21 was quantified by ELISA from tail vein injected adenoviral rescued mice (n=4  
1029 with 2 females and 2 males, n=4 with 2 females and 2 males, n=3 with 3 females and n=3 with 1  
1030 female and 2 males, for MAPL<sup>f/f</sup> + rtTA, MAPL<sup>-/-</sup> + rtTA, MAPL<sup>-/-</sup> + MAPL-Flag and MAPL<sup>-/-</sup> +  
1031 MAPL- $\Delta$ RING-Flag, respectively, 2-3 month old)

1032 **I.** Liver *Fgf21* gene expression by qRT-PCR on livers of rescued mice (in triplicate, n=7 with 4  
1033 females and 3 males, n=7 with 4 females and 3 males, n=5 with 3 females and 2 males and n=6  
1034 with 3 females and 3 males, for MAPL<sup>f/f</sup> + rtTA, MAPL<sup>-/-</sup> + rtTA, MAPL<sup>-/-</sup> + MAPL-Flag and MAPL<sup>-/-</sup>  
1035 + MAPL- $\Delta$ RING-Flag, respectively, 2-3 month old, right panel)

1036 **J.** Representative western-blot from rescued liver extracts probed for Fgf21, CHOP, P-eIF2 $\alpha$  and  
1037 eIF2 $\alpha$  as indicated.

1038 \*  $P < 0.05$  \*\*  $P < 0.01$  \*\*\*  $P < 0.001$  using T test for two group comparison and multiple  
1039 comparison correction (**C,E**) or ANOVA for multiple group comparisons (**H,I**)

1040

1041

Goyon et al., Figure 4

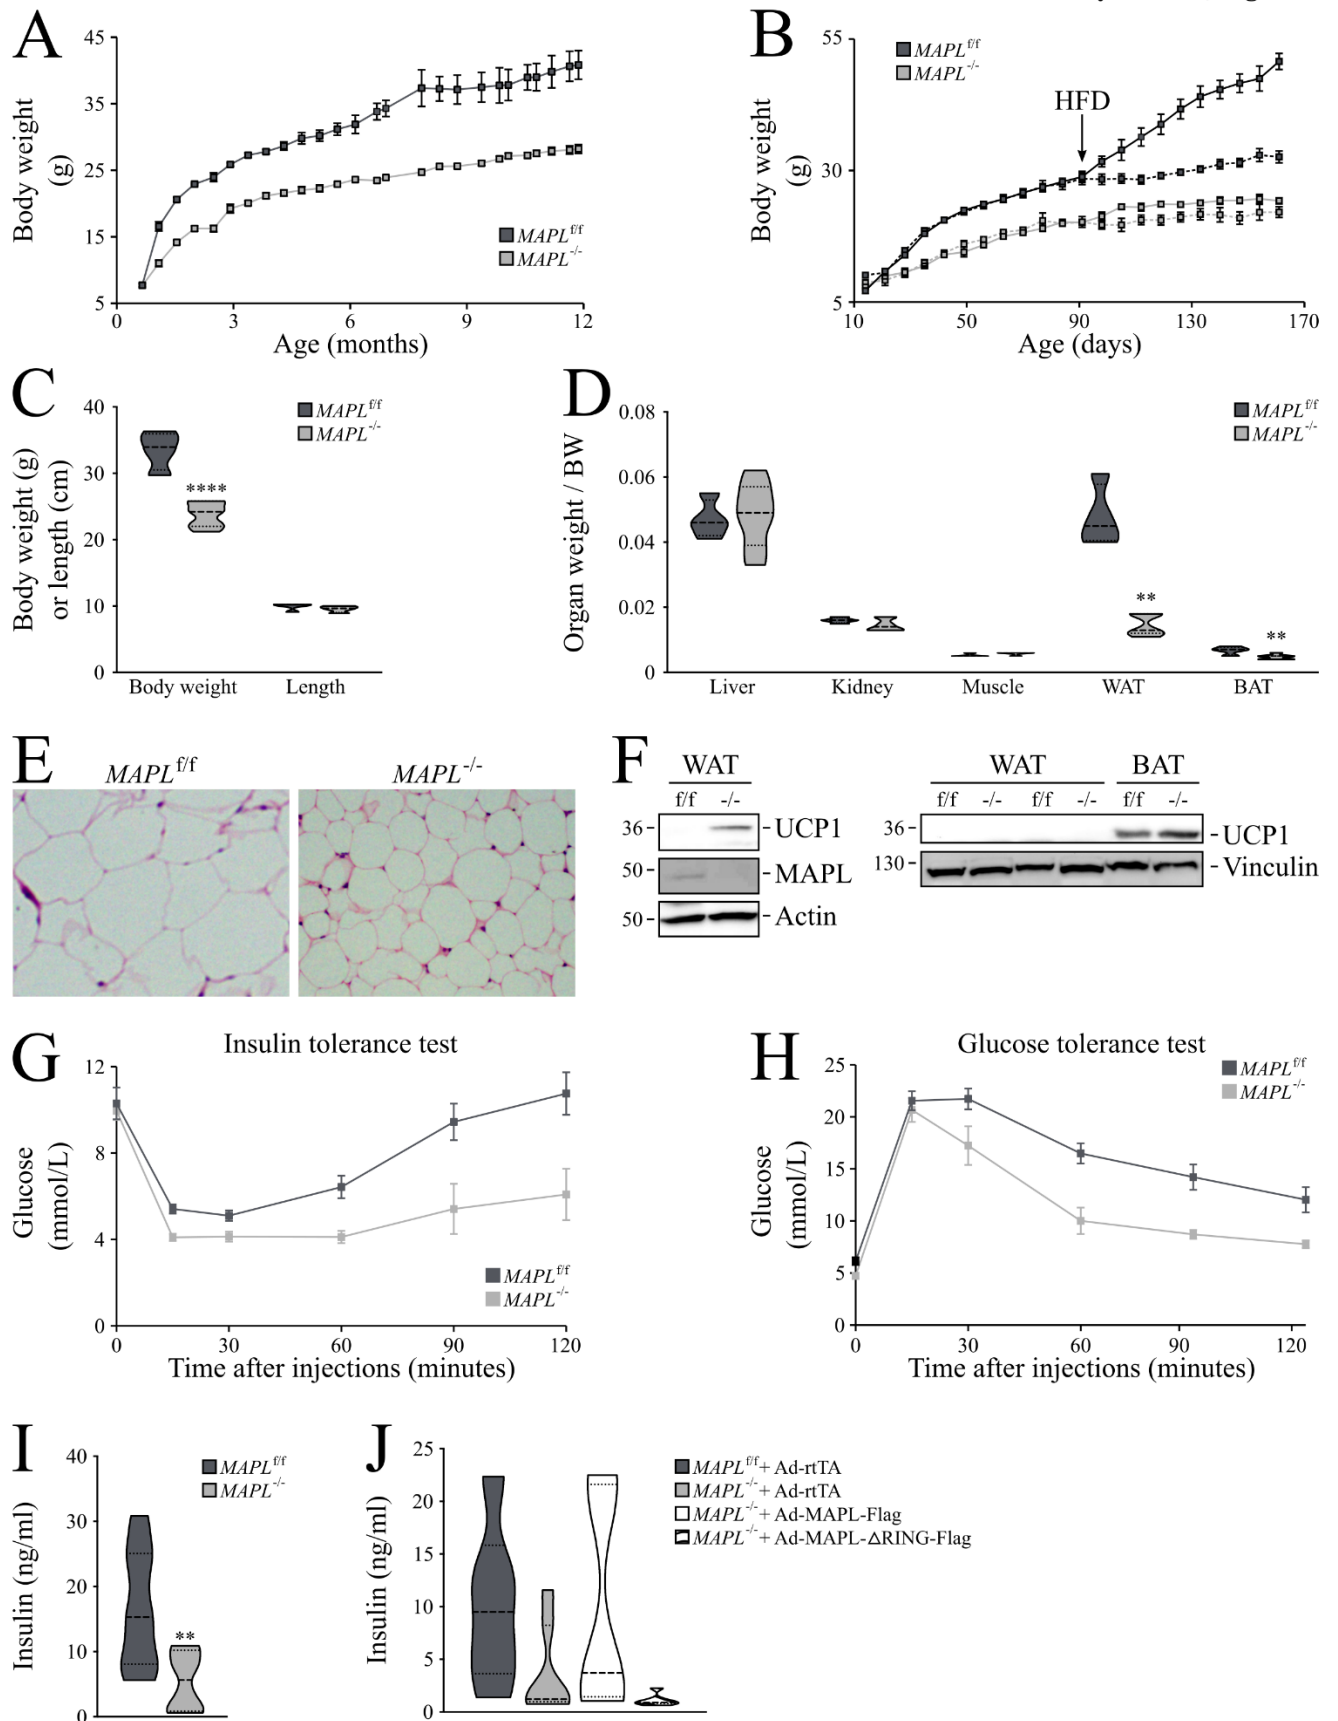

1043

1044 **Figure 4: *MAPL*<sup>-/-</sup> mice are lean and have increased glucose tolerance.**

1045 **A.** Body weight (g) of male mice fed with normal chow; *MAPL*<sup>f/f</sup> (n=6), and *MAPL*<sup>-/-</sup> (n=9).

1046 **B.** Body weight (g) of *MAPL*<sup>f/f</sup> (n=8) and *MAPL*<sup>-/-</sup> (n=7) male mice. They were fed normal chow  
1047 for 5 months (dotted lines), or for 3 months followed by 2 months of a 60% fat diet (solid lines,  
1048 diet change indicated by HFD arrow).

1049 **C.** Body weight (g, left panel) or length (cm, right panel) of 7-month-old *MAPL*<sup>f/f</sup> (n=4) or *MAPL*<sup>-/-</sup>  
1050 (n=7) male mice.

1051 **D.** Wet weight of organs including liver, kidney, gastrocnemius muscle, epididymal white fat  
1052 (WAT) and interscapular brown fat (BAT) isolated from 7-month-old male *MAPL*<sup>f/f</sup> (n=4) or  
1053 *MAPL*<sup>-/-</sup> (n=7) mice.

1054 **E.** Representative pictures of white adipocytes from *MAPL*<sup>f/f</sup> and *MAPL*<sup>-/-</sup> mice. Hematoxylin and  
1055 eosin staining, 40X objective.

1056 **F.** Representative western-blot of Ucp1 from WAT and BAT whole cell extracts from 3 different  
1057 pairs of mice (n=3).

1058 **G.** Insulin tolerance test in male *MAPL*<sup>f/f</sup> (n=7) and *MAPL*<sup>-/-</sup> (n=7) mice. Insulin (0.5 U/kg) was  
1059 injected intraperitoneally following a 4 h fast and blood glucose was measured at indicated  
1060 times.

1061 **H.** Glucose tolerance test in male *MAPL*<sup>f/f</sup> (n=8) and *MAPL*<sup>-/-</sup> (n=8) mice. Glucose (2 g/kg) was  
1062 injected intraperitoneally following an overnight fast and blood glucose was measured at  
1063 indicated times.

1064 **I.** Insulinemia (ng/mL) measured by ELISA in *MAPL*<sup>f/f</sup> (n=8) and *MAPL*<sup>-/-</sup> (n=8) male mice

1065 **J.** Insulinemia (ng/mL) measured by ELISA from tail vein injected adenoviral rescued mice (n=4  
1066 with 2 females and 2 males, n=4 with 2 females and 2 males, n=3 with 3 females and n=3 with 1  
1067 female and 2 males, for *MAPL*<sup>f/f</sup> + rtTA, *MAPL*<sup>-/-</sup> + rtTA, *MAPL*<sup>-/-</sup> + *MAPL*-Flag and *MAPL*<sup>-/-</sup> +  
1068 *MAPL*- $\Delta$ RING-Flag, respectively, 2–3-month-old).

1069 \* P < 0.05 \*\* P < 0.01 \*\*\* P < 0.001 \*\*\*\* P < 0.0001 using a repeated measures two way  
1070 ANOVA and post hoc test (**G,H,I**), unpaired T test for two group comparison (**C,D,J**)

1071

1072



Goyon et al., Figure 5

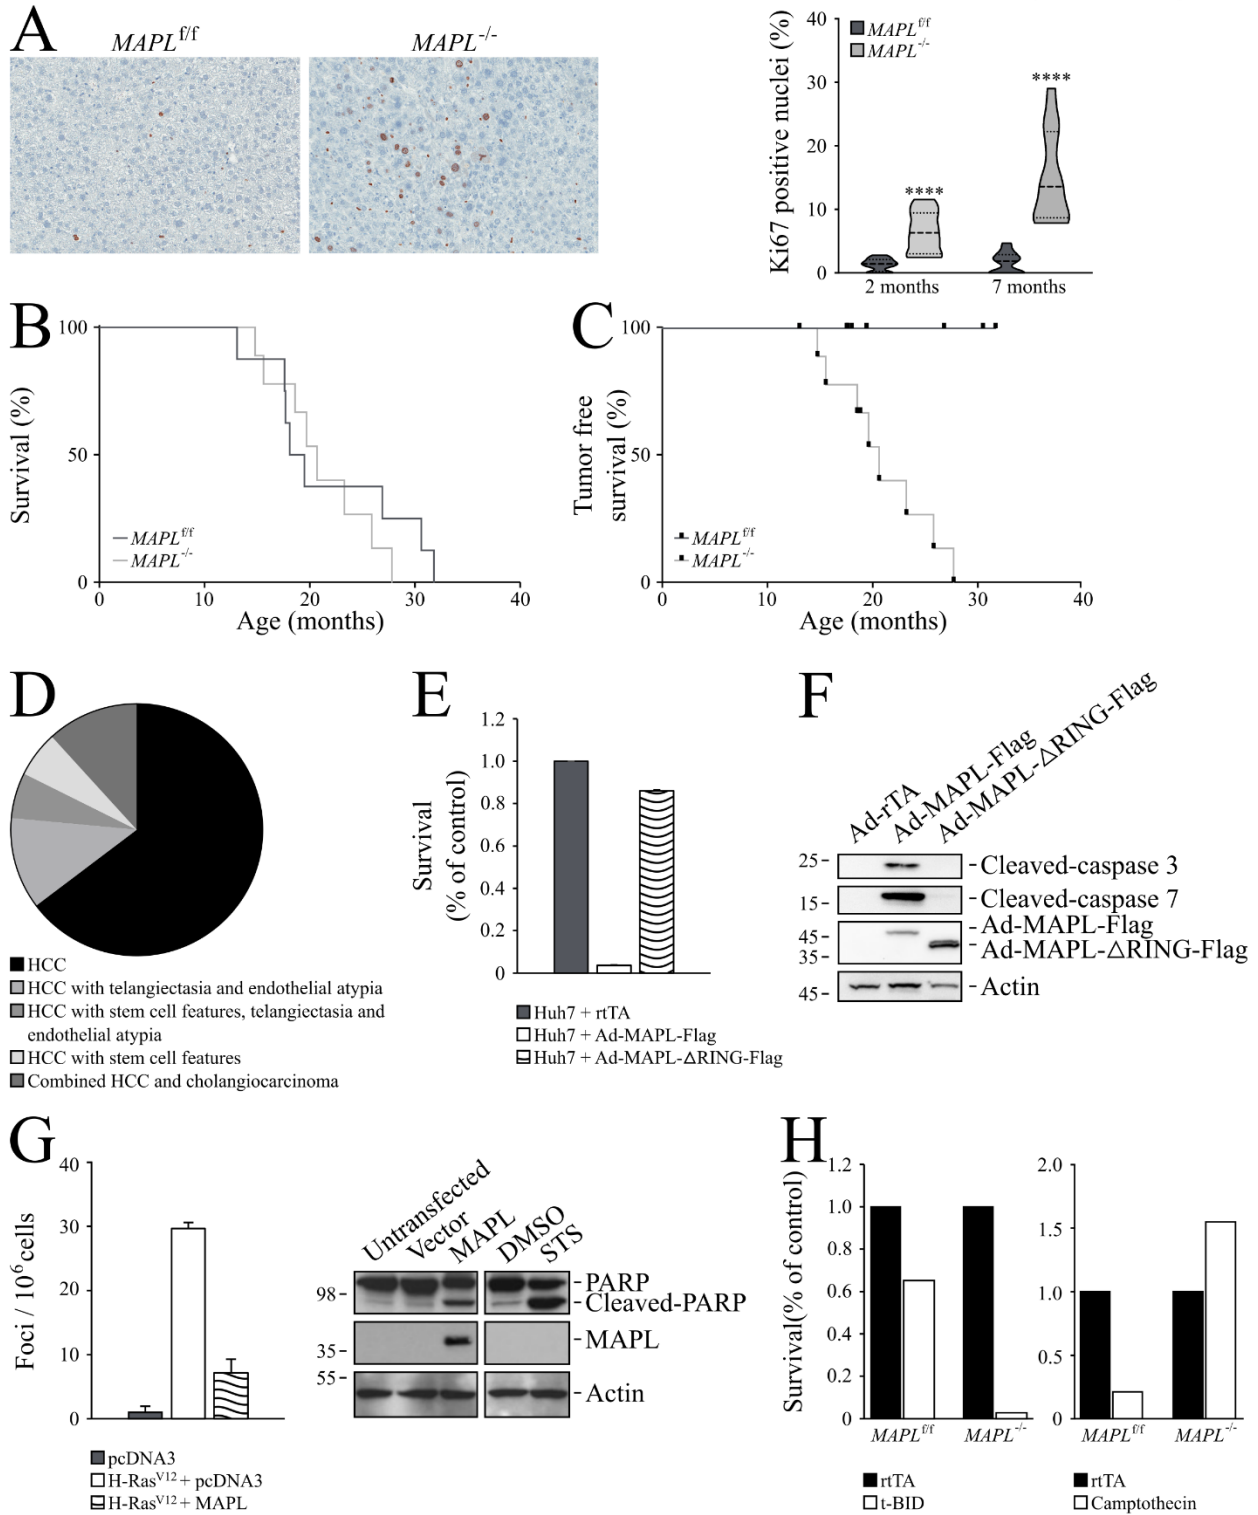

1073  
1074  
1075  
1076

Figure 5. MAPL has tumor suppressive capability.

1077 **A.** Representative pictures of Ki67 liver staining (left panel) and its quantification (right panel) in  
1078 MAPL<sup>f/f</sup> and MAPL<sup>-/-</sup> mice.  
1079 **B.** Survival curve of MAPL<sup>f/f</sup> (N=8) and MAPL<sup>-/-</sup> (N=9) mice  
1080 **C.** Cancer free survival curve of MAPL<sup>f/f</sup> (N=8) and MAPL<sup>-/-</sup> (N=9) male mice.  
1081 **D.** Pathological analysis of liver tumors in MAPL<sup>f/f</sup> and MAPL<sup>-/-</sup> mice.  
1082 **E.** Survival of Huh7 cells infected with adenoviruses expressing rTta, MAPL-flag, or MAPL-  
1083 ΔRING-flag constructs.  
1084 **F.** Immunoblots of cleaved caspase 3 and 7 from Huh7 cells infected with adenoviruses  
1085 expressing rTta, MAPL-flag, or MAPL-ΔRING-flag constructs  
1086 **G.** Ras foci in Rat2 fibroblasts cells transfected with empty pcDNA3 or overexpressing MAPL  
1087 plasmids (left panel). Immunoblots of PARP, MAPL and beta-actin in Rat2 fibroblasts  
1088 transfected with empty pcDNA3 or overexpressing MAPL plasmids (left panel). Immunoblots of  
1089 PARP, MAPL and beta-actin in Rat2 fibroblasts treated with DMSO or Staurosporine (STS, 1 μM,  
1090 3 h).  
1091 **H.** Survival of MAPL<sup>f/f</sup> and MAPL<sup>-/-</sup> primary hepatocytes infected with adenoviruses expressing  
1092 rTta or truncated BID (tBID) (left panel). Survival of MAPL<sup>f/f</sup> and MAPL<sup>-/-</sup> primary hepatocytes  
1093 treated with camptothecin (1 μM, 15 h) or vehicle.  
1094 \* P < 0.05 \*\* P < 0.01 \*\*\* P < 0.001 using T test for two group comparison and multiple  
1095 comparison correction (**A**) or ANOVA for multiple group comparisons (**E,G**)  
1096

Goyon et al., Supplemental Figure 1

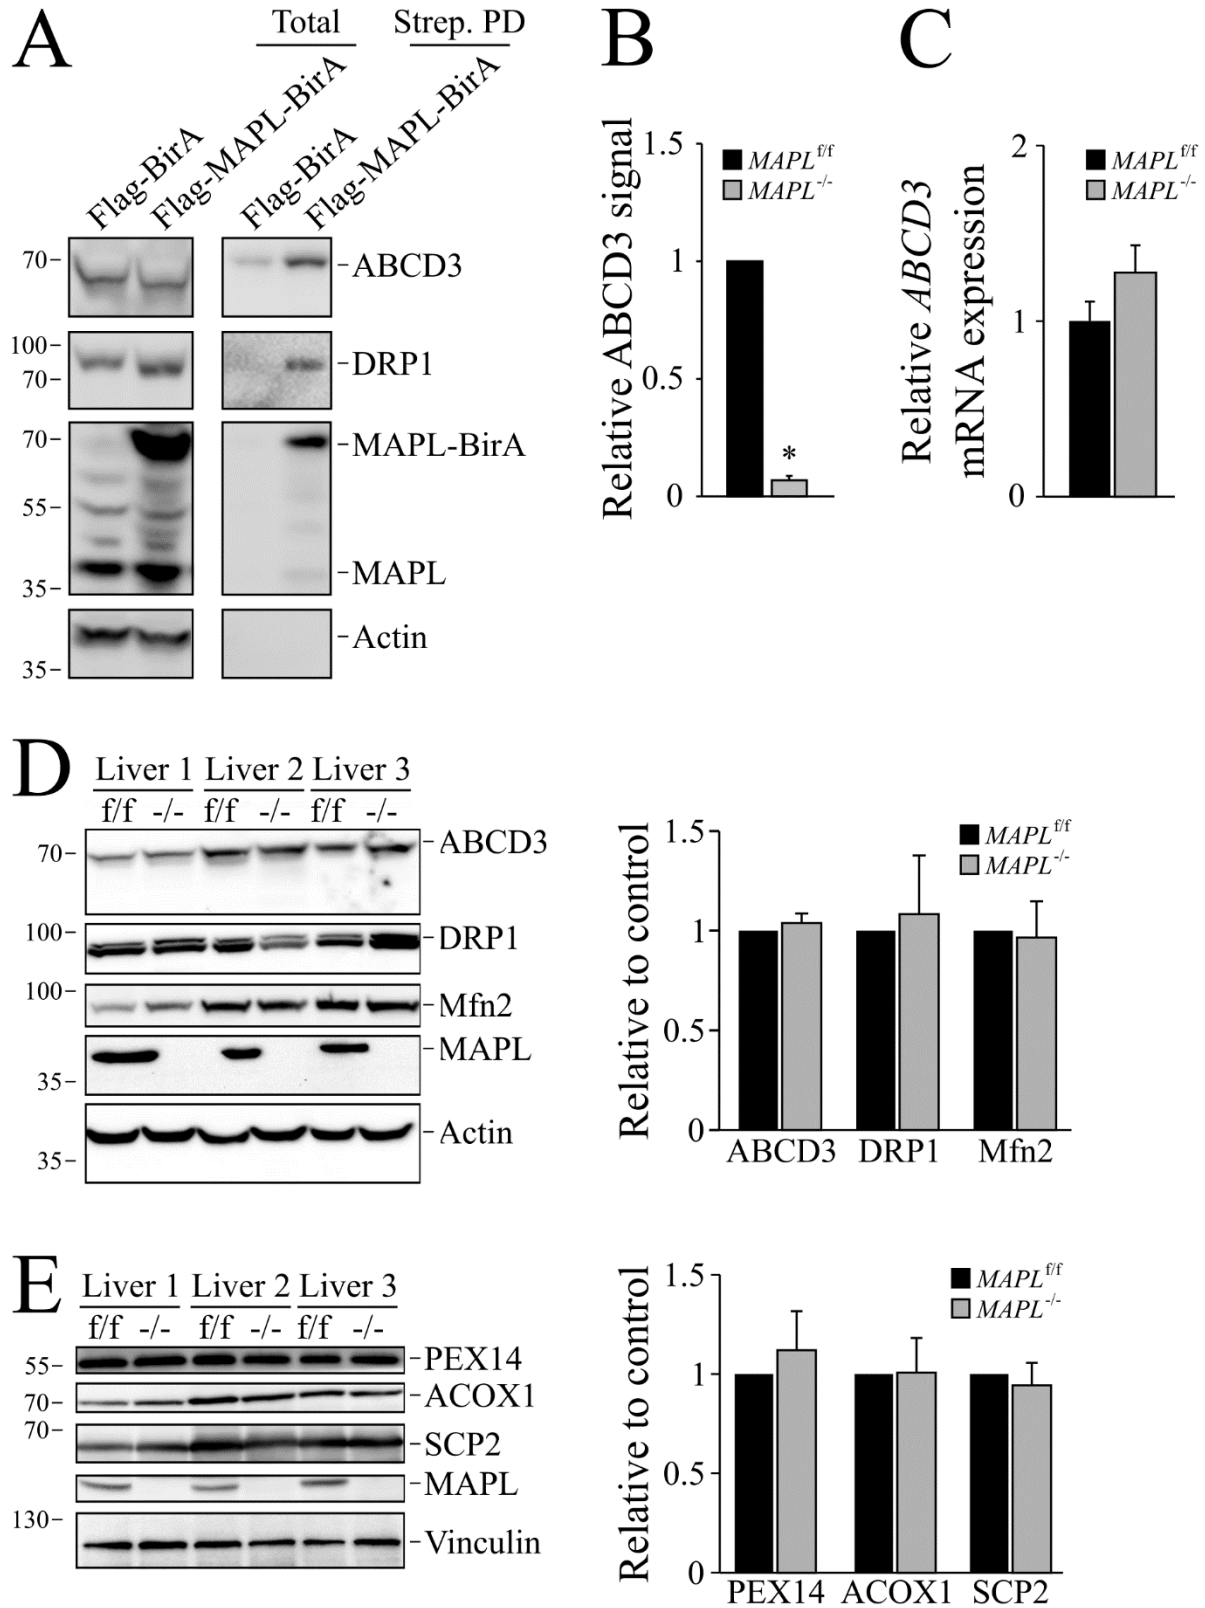

1097

1098

1099 **Figure S1: MAPL SUMOylates ABCD3 and its absence alters ABCD3 complex assembly.**

1100 **A.** Representative western-blot of total lysate and streptavidin-beads pull-down fractions of  
1101 HEK-293T-REX cells expressing Flag-MAPL-BirA or Flag-BirA (as control) incubated with biotin  
1102 and probed for ABCD3, DRP1, MAPL and beta-actin.

1103 **B.** Quantification from 3 independent experiments of ABCD3 signals of the heavy membrane  
1104 SIM-beads elution fraction (Figure 1C).

1105 **C.** qRT-PCR investigating *ABCD3* mRNA levels in livers of 4 different mice (2-month-old males).

1106 **D.** Representative western blots from whole cell liver extracts probed for ABCD3, DRP1 and  
1107 Mfn2 (Left panel). ABCD3, Drp1 and Mfn2 signals were quantified (n=3 for each strain, right  
1108 panel).

1109 **E.** Representative western blots from whole cell liver extracts probed for PEX14, ACOX1 and  
1110 SCP2 (Left panel). PEX14, ACOX1 and SCP2 signals were quantified (n=3 for each strain, right  
1111 panel).

1112 \*  $P < 0.05$  \*\*  $P < 0.01$  \*\*\*  $P < 0.001$  using T test for two group comparison and multiple  
1113 comparison correction (**B,C,D,E**)

1114

1115

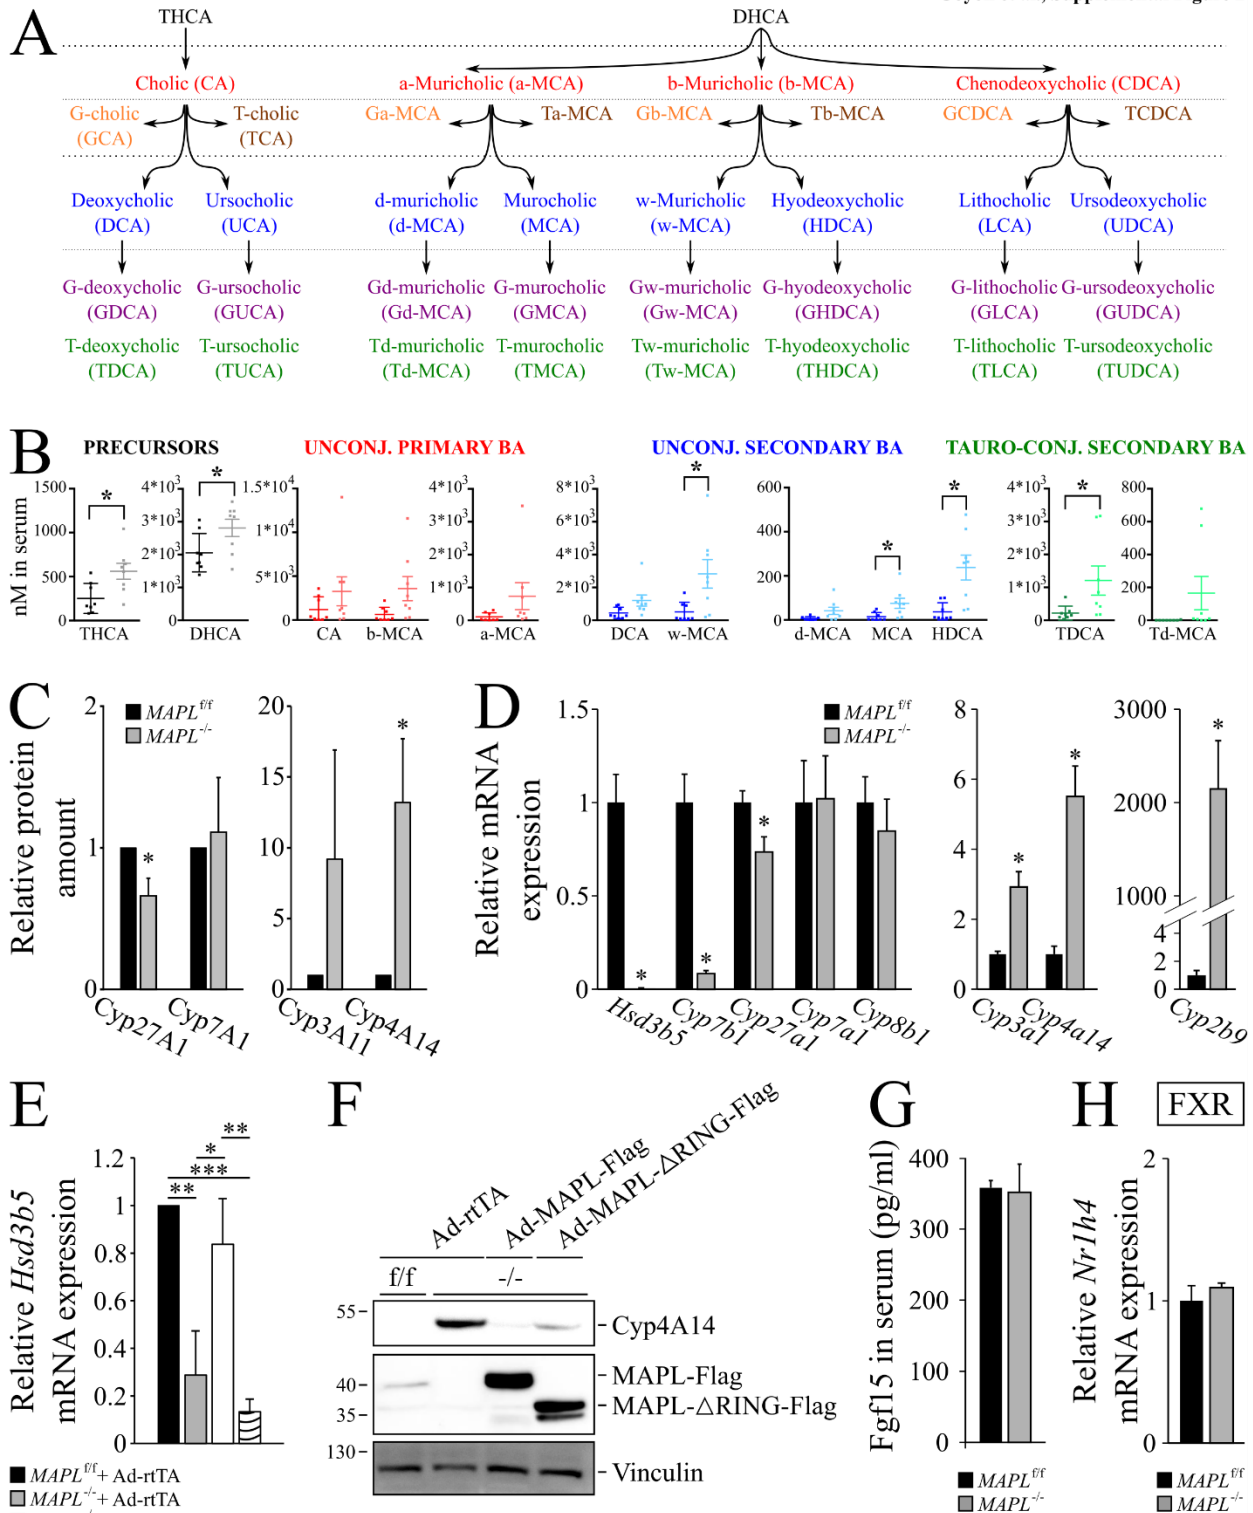

1116  
1117  
1118  
1119

1120 **Figure S2: Loss of MAPL alters bile acid synthesis.**

1121 **A.** A model depicting the generation of the main murine bile acids from THCA and DHCA (tri-  
1122 and dihydroxycholestanoic acids) (G: glyco-; T: Tauro-).

1123 **B.** Bile acids precursors, as well as unconjugated and conjugated primary and secondary bile  
1124 acids were quantified from serum (n=8 for each strain, 2-month-old males). THCA and DHCA:  
1125 tri- and dihydroxycholestanoic acid; CA: cholic acid; a-MCA, b-MCA, w-MCA and d-MCA:  $\alpha$ -,  $\beta$ -,  
1126  $\gamma$ - and  $\delta$ -muricholic acid; DCA: deoxycholic acid; MCA: murocholic acid; HDCA: hyodeoxycholic  
1127 acid; TDCA: taurodeoxycholic acid; td-MCA: tauro- $\delta$ -muricholic acid.

1128 **C.** Quantification of CYP27A1, Cyp7A1, Cyp3A11 and Cyp4A14 of Figure 2G western blots (n=3  
1129 for each strain).

1130 **D.** Transcriptome analysis (Illumina) was validated by qRT-PCR on livers isolated from 3  
1131 different mice for each strain (2-month-old males).

1132 **E.** qRT-PCR investigating *Hsd3b5* mRNA levels in livers of rescued mice (in triplicate, n=7 with 4  
1133 females and 3 males, n=7 with 4 females and 3 males, n=5 with 3 females and 2 males and n=6  
1134 with 3 females and 3 males, for MAPL<sup>f/f</sup> + rtTA, MAPL<sup>-/-</sup> + rtTA, MAPL<sup>-/-</sup> + MAPL-Flag and MAPL<sup>-/-</sup>  
1135 + MAPL- $\Delta$ RING-Flag, respectively, 2–3-month-old).

1136 **F.** Representative western-blot of Cyp4A14 protein levels in livers isolated from rescued mice.

1137 **G.** Circulating Fgf15 was measured by ELISA (n=5 and n=6 for MAPL<sup>f/f</sup> and MAPL<sup>-/-</sup> respectively,  
1138 2-month-old males).

1139 **H.** qRT-PCR investigating *Nr1h4* mRNA levels (FXR) in livers of 3 different mice (2-month-old  
1140 males).

1141 \*  $P < 0.05$  \*\*  $P < 0.01$  \*\*\*  $P < 0.001$  using T test for two group comparison and multiple  
1142 comparison correction

1143

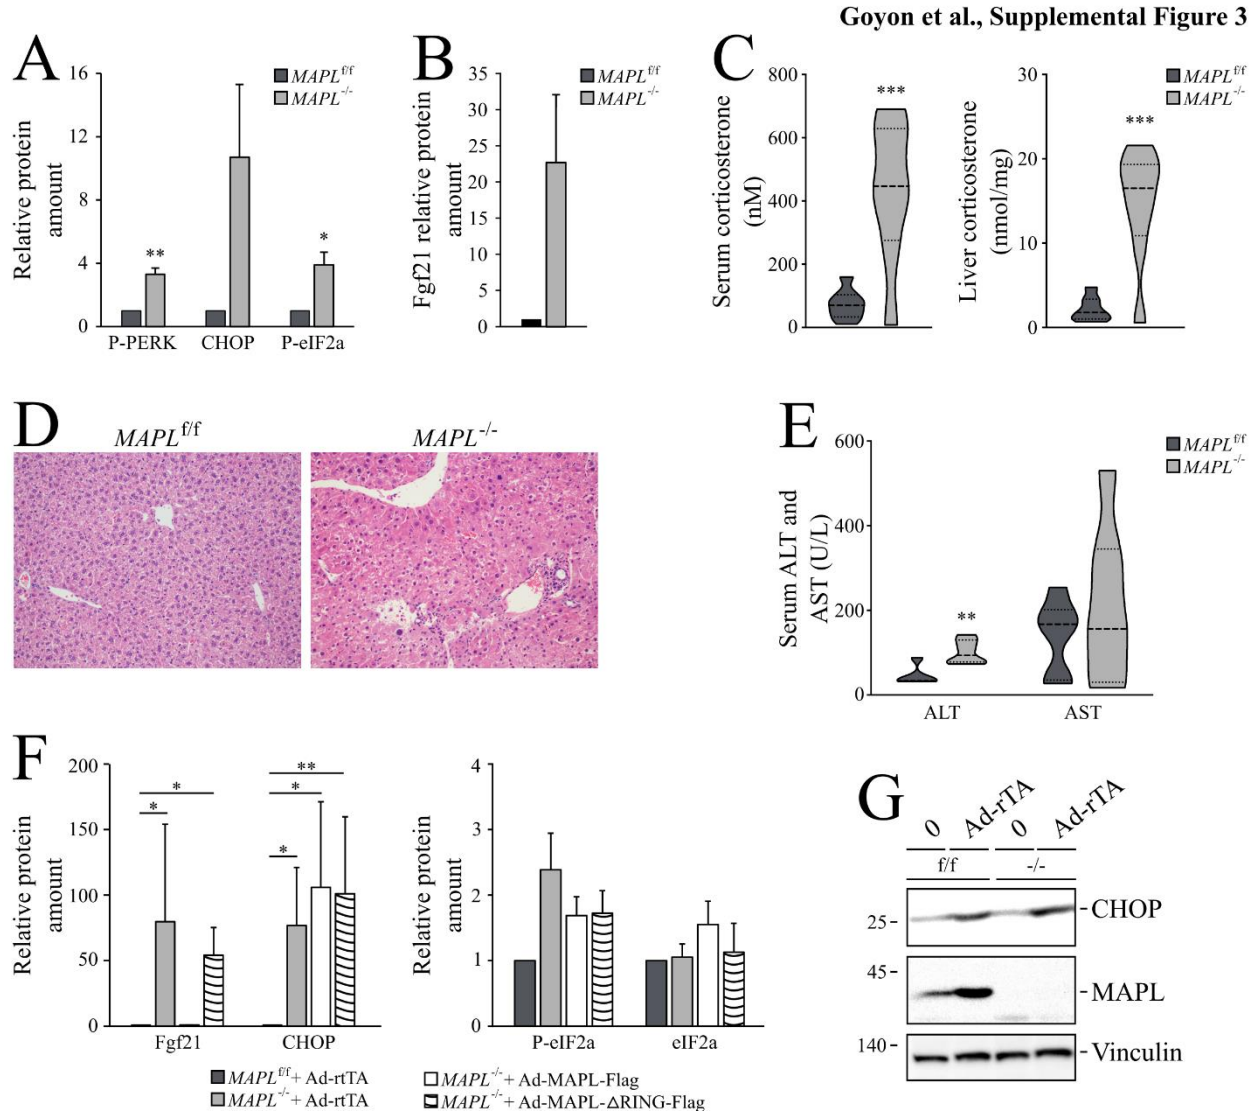

1144  
1145  
1146

**Figure S3: Loss of MAPL leads to hepatic ER stress, eIF2α activation and Fgf21 expression.**

1147 **A.** Quantification of phospho-PERK, CHOP and eIF2α signals presented in Figure 3A and 3B  
1148 western-blot (n=3 for each strain).  
1149 **B.** Quantification of Fgf21 signals presented in Figure 3D (n=3 for each strain).  
1150 **C.** Circulating and liver corticosterone levels were quantified as described in materials and  
1151 methods (n=8 for each strain, 2 month old males).  
1152 **D.** Representative pictures of livers from *MAPL<sup>f/f</sup>* and *MAPL<sup>-/-</sup>* mice. Hematoxylin and eosin  
1153 staining. 40X objective.  
1154 **E.** Levels of alanine transaminase (ALT) and aspartate transaminase (AST), markers of liver  
1155 damage, were quantified and plotted from serum collected from 6 month old females (n=5 and  
1156 n=6 for *MAPL<sup>f/f</sup>* and *MAPL<sup>-/-</sup>*, respectively for ALT quantification and n=6 and n=7 for *MAPL<sup>f/f</sup>*  
1157 and *MAPL<sup>-/-</sup>*, respectively for AST quantification).

1158 **F. Left panel.** Quantification of FGF21 signals presented in Figure 3E (n=5, 5, 3 and 4 for MAPL<sup>ff</sup>  
1159 + rtTA, MAPL<sup>-/-</sup> + rtTA, MAPL<sup>-/-</sup> + MAPL-Flag and MAPL<sup>-/-</sup> + MAPL-ΔRING-Flag, respectively, 2-3  
1160 month old). **Right panel.** Quantification of CHOP, P-eIF2α and eIF2α signals of Figure 3J (n=4, 4,  
1161 3 and 4 for MAPL<sup>ff</sup> + rtTA, MAPL<sup>-/-</sup> + rtTA, MAPL<sup>-/-</sup> + MAPL-Flag and MAPL<sup>-/-</sup> + MAPL-ΔRING-Flag,  
1162 respectively, 2-3 month old).

1163 **G.** Representative western-blot of CHOP protein expression of livers isolated from MAPL<sup>ff</sup> and  
1164 MAPL<sup>-/-</sup> animals injected or not with the empty virus rtTA.

1165  
1166 \*  $P < 0.05$  \*\*  $P < 0.01$  \*\*\*  $P < 0.001$  using T test for two group comparison and multiple  
1167 comparison correction (**A,B,C,E**) or ANOVA for multiple group comparisons (**F**)  
1168  
1169  
1170  
1171  
1172  
1173  
1174  
1175  
1176  
1177  
1178



Goyon et al., Supplemental Figure 4

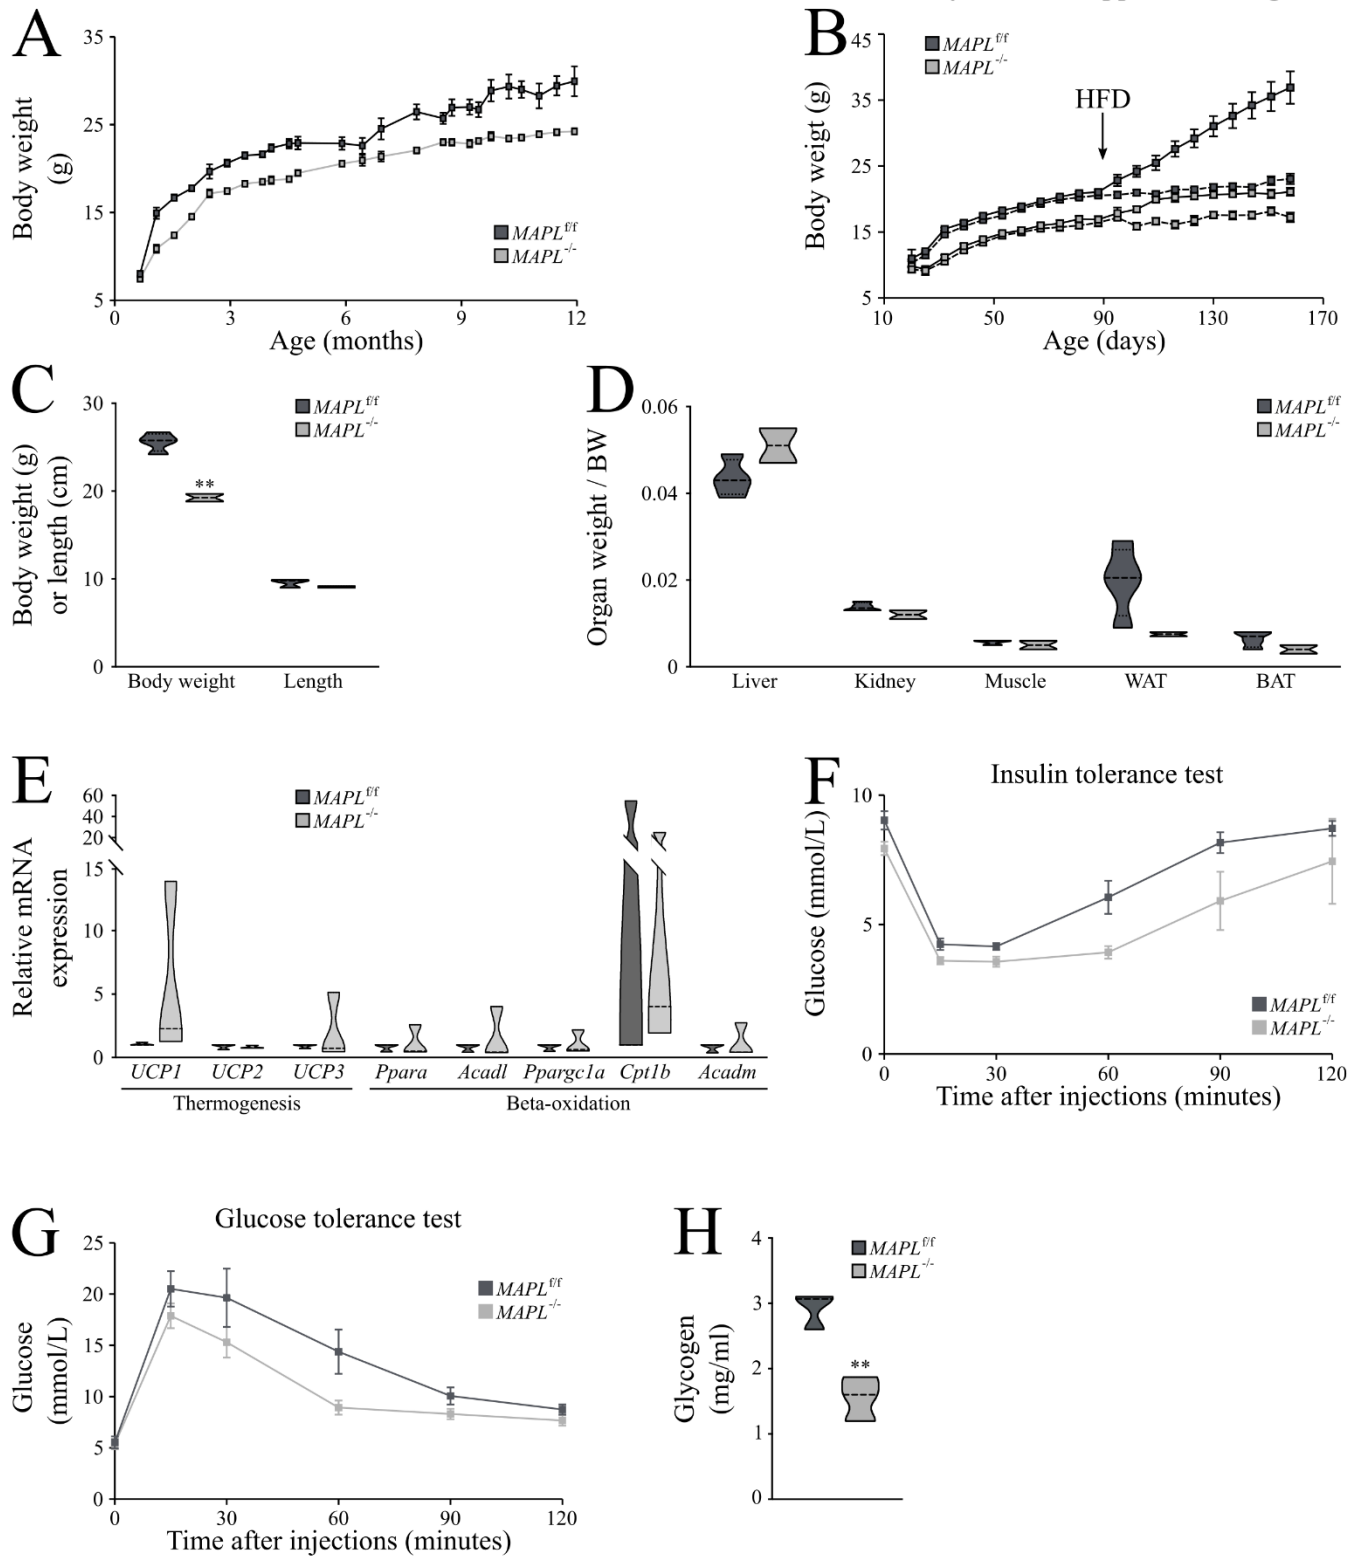

1179  
1180  
1181  
1182

1183 **Figure S4: MAPL<sup>-/-</sup> female mice are lean and resistant to weight gain.**

1184 **A.** Female mice fed with normal chow were weighed weekly; MAPL<sup>f/f</sup> (n=7) and MAPL<sup>-/-</sup> (n=10).

1185 **B.** MAPL<sup>f/f</sup> and MAPL<sup>-/-</sup> (n=8 for each strain) females were fed with normal chow for 5 months  
1186 (dotted lines), or for 3 months followed by 2 months of 60% fat chow (solid lines, diet change  
1187 indicated by HFD arrow).

1188 **C.** Body weight (g, left panel) and length (cm, right panel) of 7-month old MAPL<sup>f/f</sup> (n=4) and  
1189 MAPL<sup>-/-</sup> (n=2) female mice.

1190 **D.** Wet weight of organs including liver, kidney, gastrocnemius muscle, epididymal white fat  
1191 (WAT) and interscapular brown fat (BAT) isolated from 7-month-old MAPL<sup>f/f</sup> (n=4) or MAPL<sup>-/-</sup>  
1192 (n=2) female mice.

1193 **E.** White adipose tissue gene expression performed by qRT-PCR. N=3, in triplicate, 2-month-old  
1194 MAPL<sup>f/f</sup> and MAPL<sup>-/-</sup> male mice.

1195 **F.** Insulin tolerance test in MAPL<sup>f/f</sup> (n=7), MAPL<sup>-/-</sup> (n=11) female mice. Insulin (0.5 U/kg) was  
1196 injected intraperitoneally after a 2 h fast and blood glucose was measured at indicated times.

1197 **G.** Glucose tolerance test in MAPL<sup>f/f</sup> (n=7), MAPL<sup>-/-</sup> (n=11) female mice. Glucose (2 g/kg) was  
1198 injected intraperitoneally after an overnight fast and blood glucose was measured at indicated  
1199 times.

1200 **H.** Liver glycogen measured enzymatically in female MAPL<sup>f/f</sup> (n=7), MAPL<sup>-/-</sup> (n=11) mice.

1201 \*  $P < 0.05$  \*\*  $P < 0.01$  \*\*\*  $P < 0.001$  using T test for two group comparison and multiple  
1202 comparison correction or ANOVA for multiple group comparisons

1203

1204

1205

1206

Goyon et al., Supplemental Figure 5

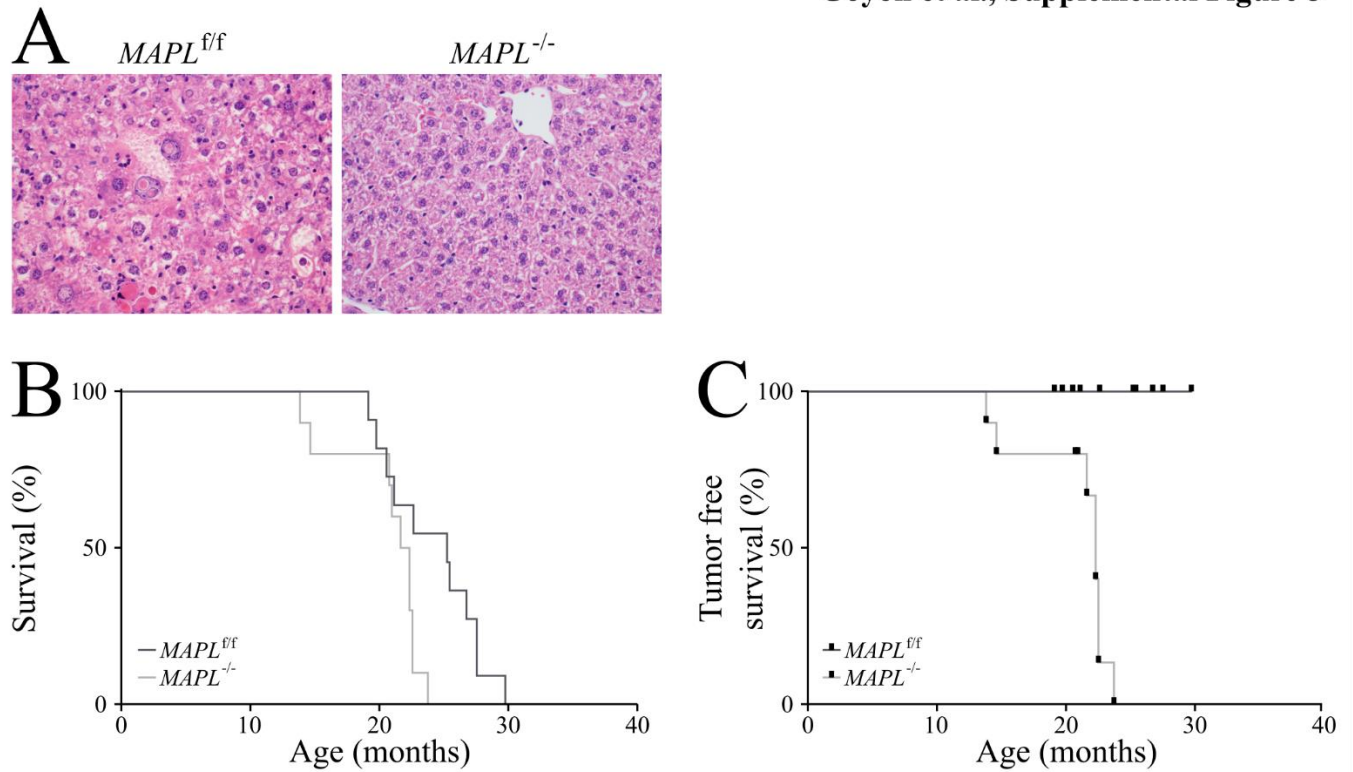

1207  
1208  
1209  
1210  
1211  
1212  
1213  
1214  
1215  
1216

**Figure S5: Spontaneous development of hepatocellular carcinoma in female MAPL deficient mice.**

A. Hematoxylin eosin staining of female *MAPL*<sup>f/f</sup> and *MAPL*<sup>-/-</sup> livers.

B. Survival curve of *MAPL*<sup>f/f</sup> (N=11) and *MAPL*<sup>-/-</sup> (N=11) female mice.

C. Cancer free survival curve of *MAPL*<sup>f/f</sup> (N=11) and *MAPL*<sup>-/-</sup> (N=11) female mice.

1217

1218

1219 **Supplementary Table 1: BioID analysis of MAPL interacting proteins.**

1220 MAPL-BirA\*Flag BioID results. Data are presented as spectral counts detected for each prey  
1221 protein, as indicated. Two technical replicates were performed on each of two unique biological  
1222 replicates (for a total of four MS analyses). Selection of preys was based on ProteinProphet  
1223 confidence score  $p \geq 0.85$  (FDR <1%) and SAINT Express score  $\geq 0.9$ . For control runs, only the  
1224 highest four spectral counts (out of 16 runs) are shown.

1225

1226 **Supplementary Table 2: Quantification of bile acid species from liver and serum.**

1227 Precursors, unconjugated and conjugated primary and secondary bile acids were quantified as  
1228 described in materials and methods on liver and serum from 2-month-old males (n=8 for each  
1229 strain).

1230

1231 **Supplementary Table 3: Transcriptome analysis from liver.**

1232 Table presenting data from the Illumina analysis performed on 5-month-old males (n=3, for  
1233 each strain, in triplicate) as described in material and methods, summarizing genes with  
1234 variations higher than 2-fold (with a p value lower than 0.05) implicated in different metabolic  
1235 pathways.

1236

1237

1238

1239
